# Supplementary material
Source: PubMed Central journal article supplement (PMC3861731)

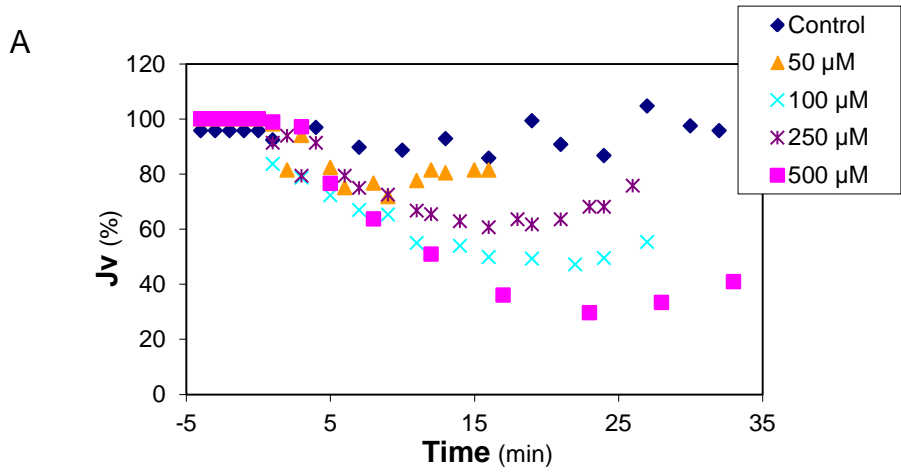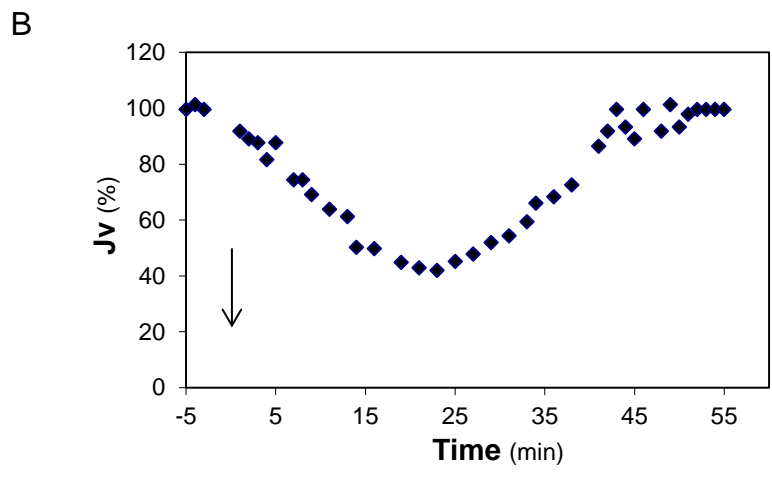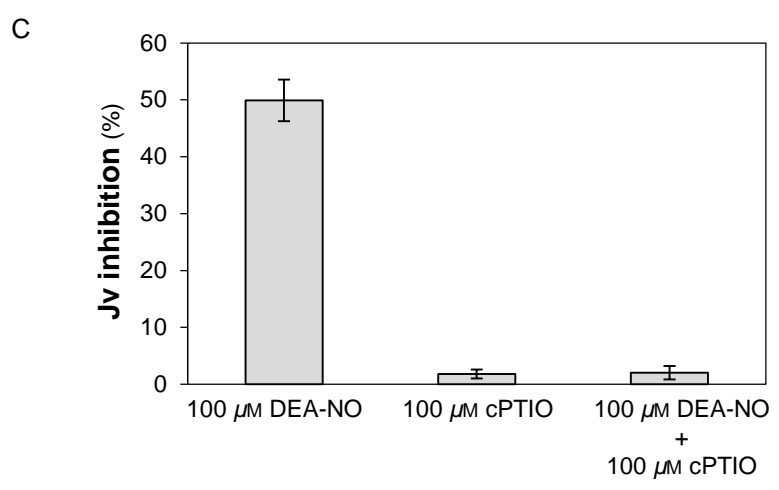

Supplemental FIG. S1

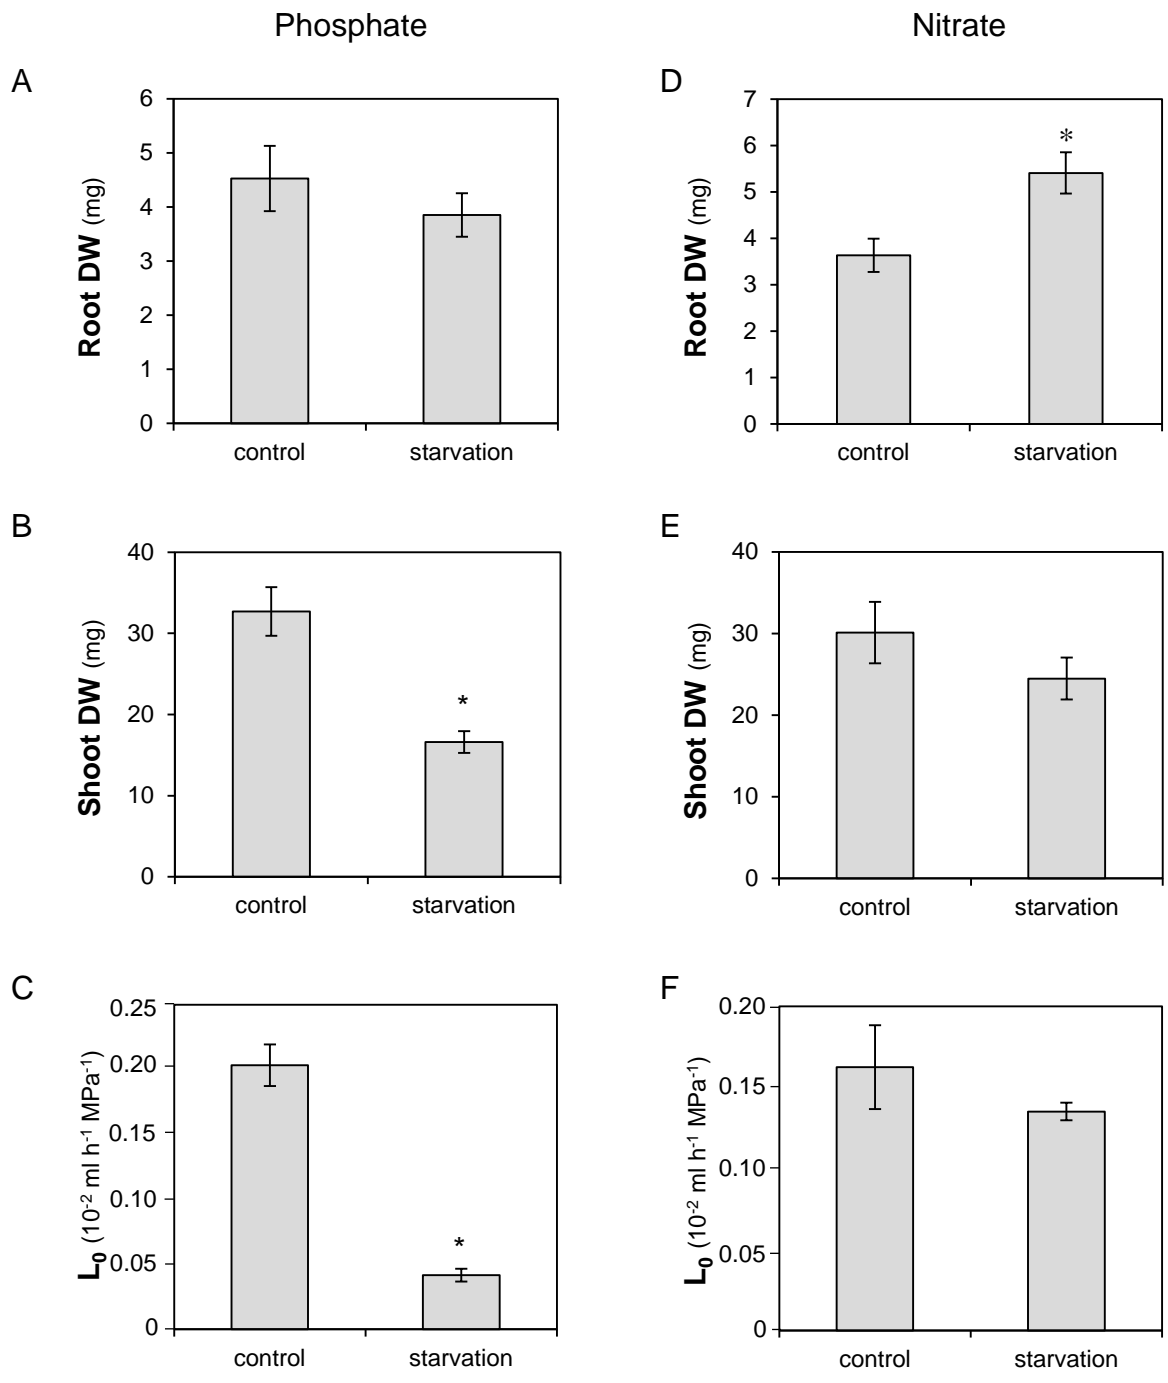

Supplemental FIG. S2

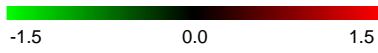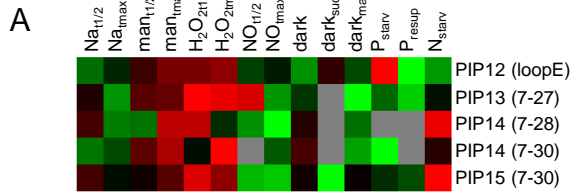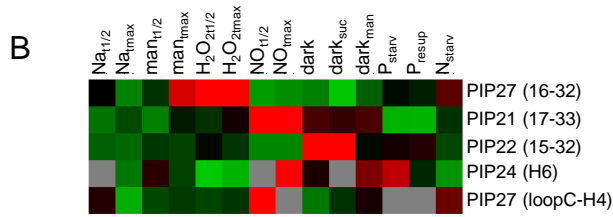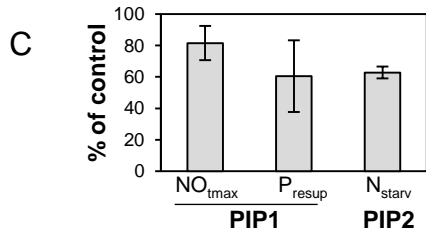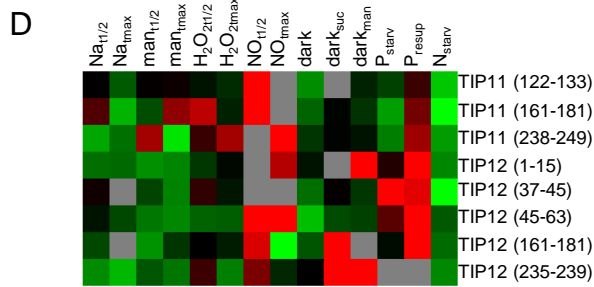

## A

|        |                               |     |
|--------|-------------------------------|-----|
| PIP2;1 | RASGSKSLG <b>SFRSA</b> ANV    | 287 |
| PIP2;2 | RASGSKSLG <b>SFRSA</b> ANV    | 285 |
| PIP2;3 | RASGSKSLG <b>SFRSA</b> ANV    | 285 |
| PIP2;4 | RAAAIKALG <b>SFGSFGSFRSFA</b> | 291 |
| PIP2;7 | RASAIKALG <b>SFRSN</b> ATN    | 280 |

## B

|        |                                         |     |
|--------|-----------------------------------------|-----|
| PIP1;1 | CGAGVVKGFQPKQYQALGGGAN <b>T</b> VAHGYT  | 173 |
| PIP1;2 | CGAGVVKGFQPKQYQALGGGAN <b>T</b> IAHGYT  | 173 |
| PIP1;3 | CGAGVVKGFQPNPYQTLGGGAN <b>T</b> VAHGYT  | 173 |
| PIP1;4 | CGAGVVKGFQPTPYQTLGGGAN <b>T</b> VAHGYT  | 174 |
| PIP1;5 | CGAGVVKGFQPLYQTNGGGAN <b>V</b> VAHGYT   | 174 |
| PIP2;1 | CGVGFVKAFQSSYYTRYGGGAN <b>N</b> SLADGYS | 166 |
| PIP2;2 | CGVGFVKAFQSSYYDRYGGGAN <b>N</b> SLADGYN | 164 |
| PIP2;3 | CGVGFVKAFQSSHYVNYGGGAN <b>F</b> LADGYN  | 164 |
| PIP2;4 | CGCGFVKAFQSSYYTRYGGGAN <b>N</b> ELADGYN | 166 |
| PIP2;5 | CGVALVKAFQSAYFTRYGGGAN <b>N</b> GLSDGYS | 165 |
| PIP2;6 | CGVGLVKVFQSTYYNRYGGGAN <b>N</b> MLSDGYN | 165 |
| PIP2;7 | CGVGFVKAFMKTPYNTLGGGAN <b>T</b> VADGYS  | 159 |
| PIP2;8 | CGVGLVKAFMMTPYKRLGGGAN <b>T</b> VADGYS  | 157 |

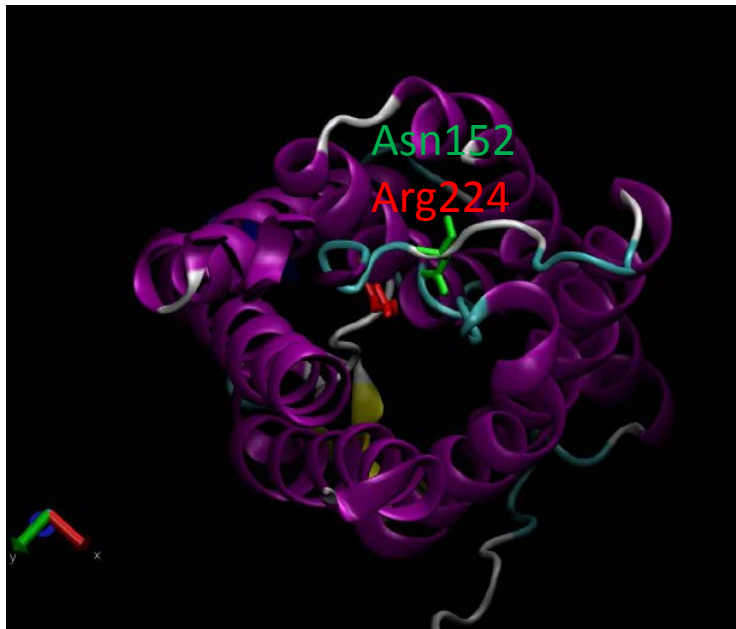

Supplement: supp_M113.028241_mcp.M113.028241-1.pdf [file supp_M113.028241_mcp.M113.028241-1.pdf]
