# Supplementary material
Source: PubMed Central journal article supplement (PMC3861731)

PIP11 12 (15-29) 1P 1Dea - 581.25 - charge 3 - Ions Score: 28

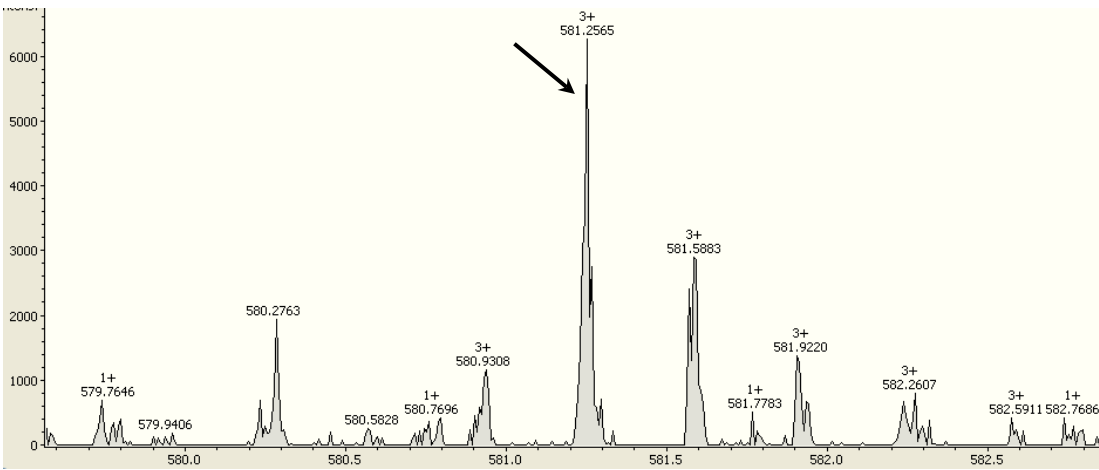

PIP21 (4-16) 1Dea - 469.23 - charge 3 - Ions Score: 51

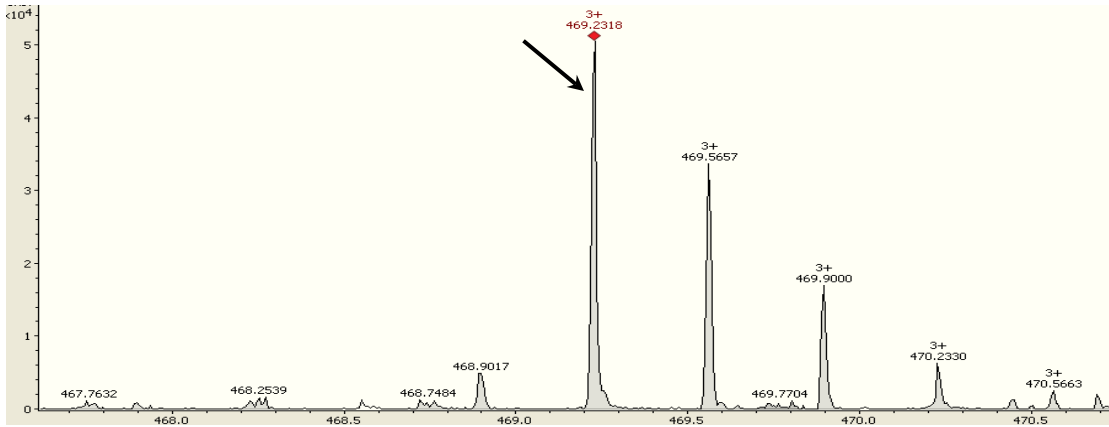

PIP22 (4-14) 1Dea - 618.29 - charge 2 - Ions Score: 68

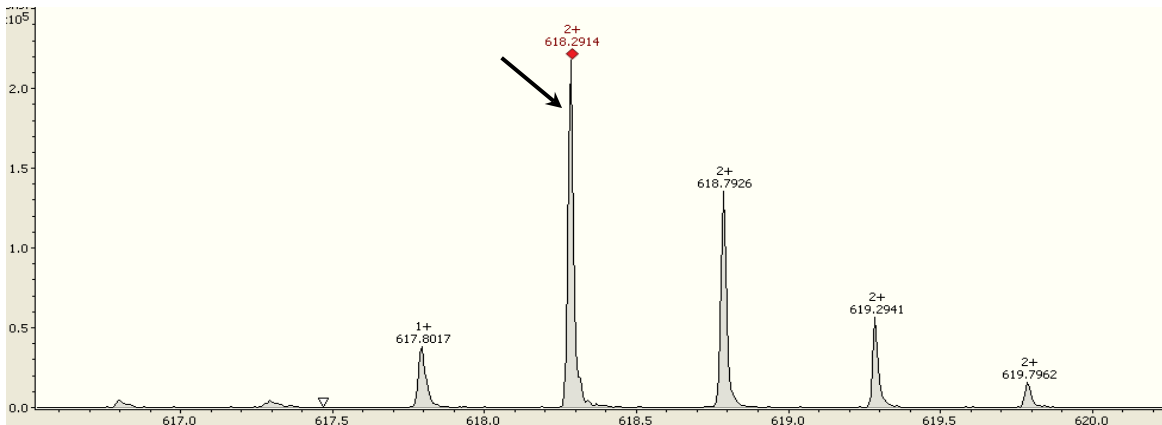

PIP24 (4-16) 1Dea - 671.32 - charge 2 - Ions Score: 56

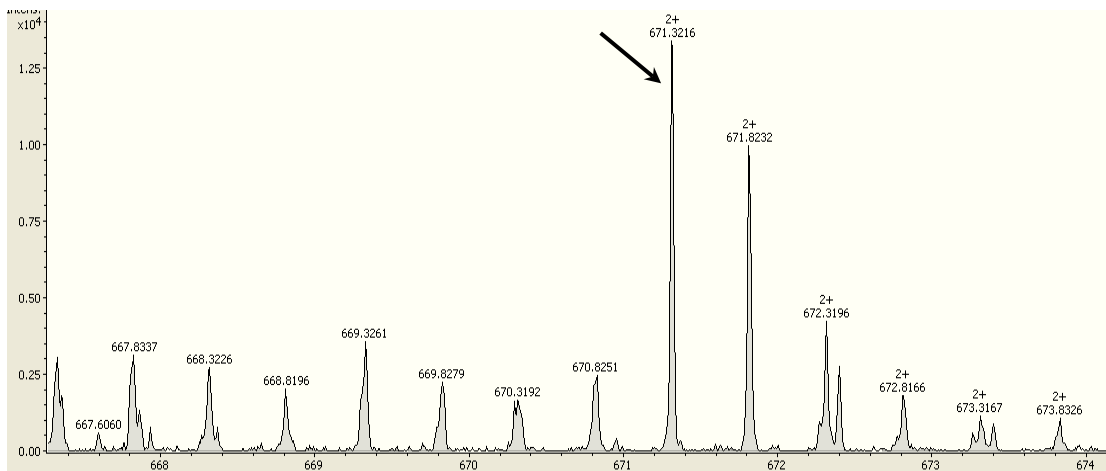

PIP21 (17-33) 1Dea - 625.31 - charge 3 - Ions Score: 44

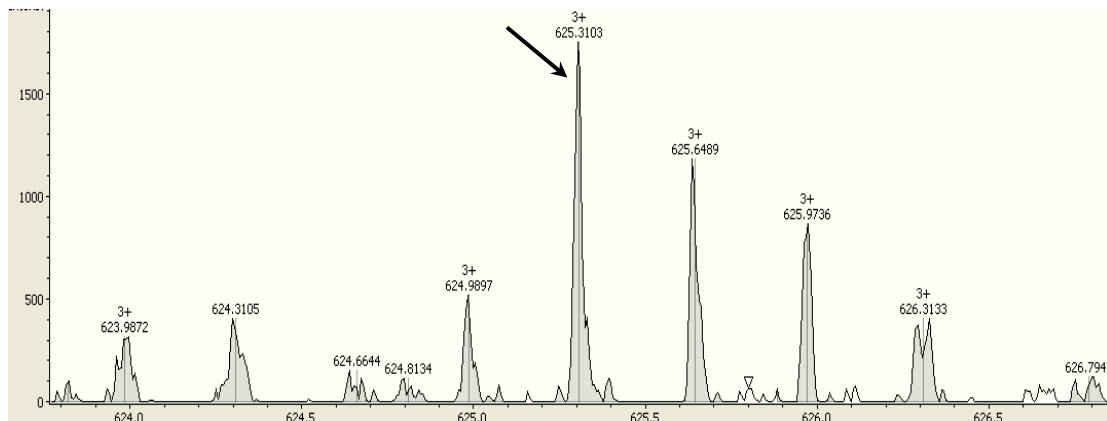

PIP12 (loopC) 1Dea - 617.63 - charge 3 - Ions Score: 67

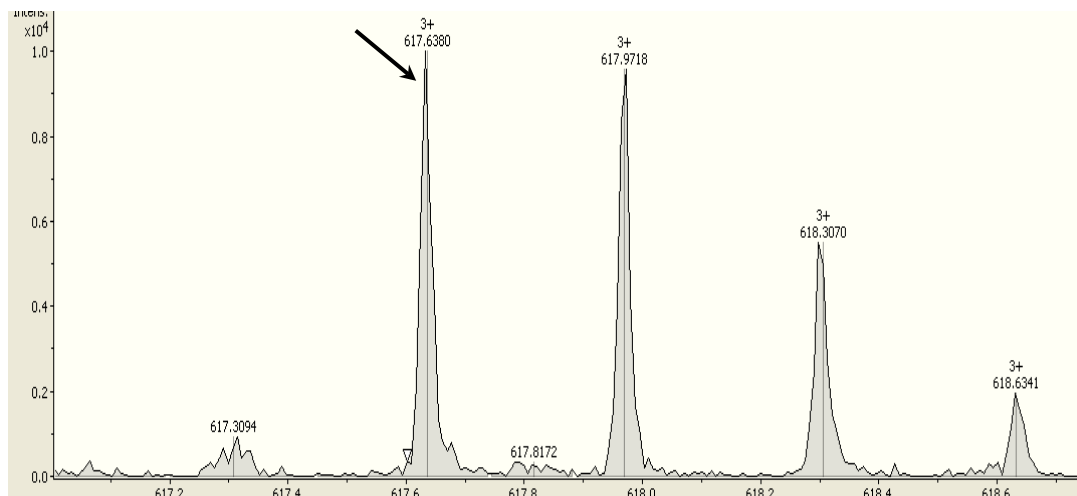

PIP15 (loopC) 1Dea - 779.72 - charge 3 - Ions Score: 90

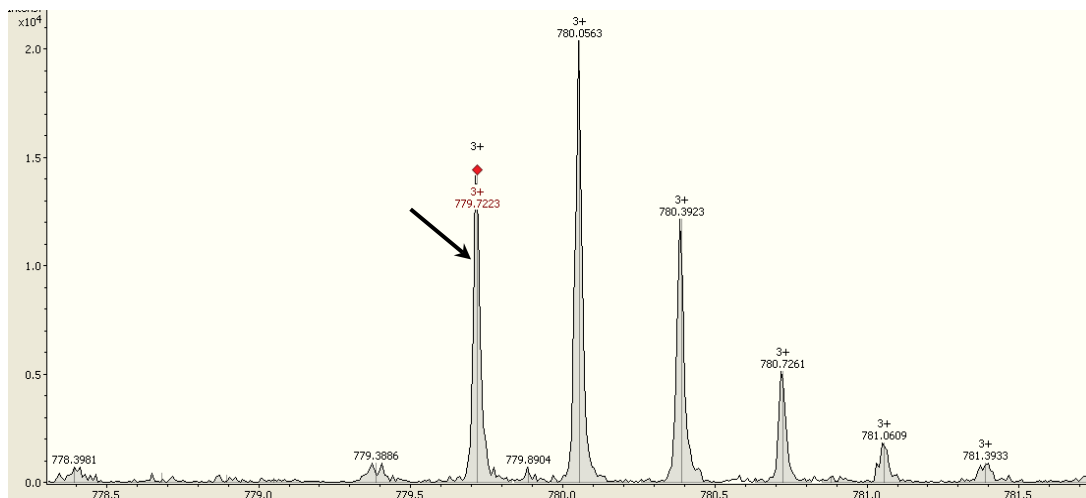

PIP24 (loopC) 1Dea - 715.32 - charge 2 - Ions Score: 86

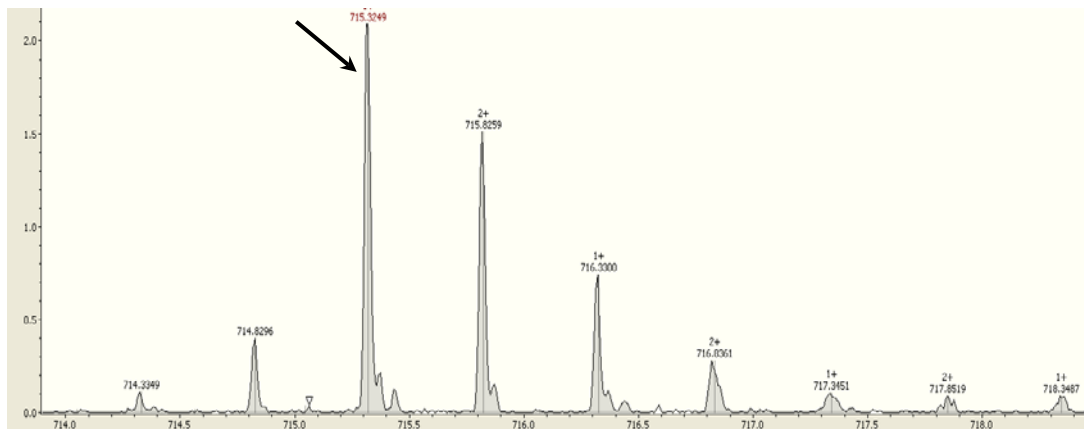

PIP27 (loopC) 1Dea - 943.95 - charge 2 - Ions Score: 101

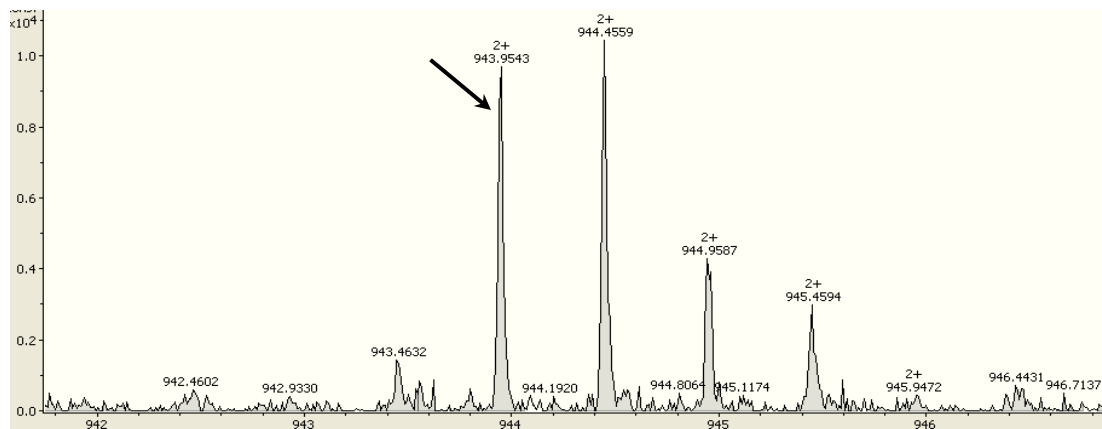

PIP21 (277-287) 1P 1Dea - 595.26 - charge 2 - Ions Score: 48

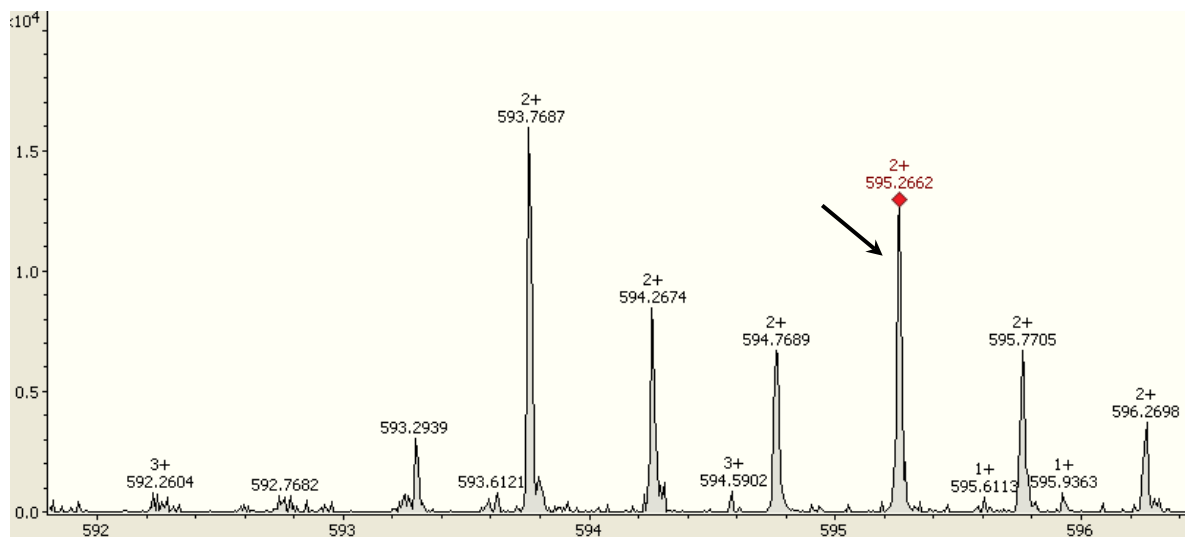

PIP21 (277-287) 2P 1Dea - 635.24 - charge 2 - Ions Score: 42

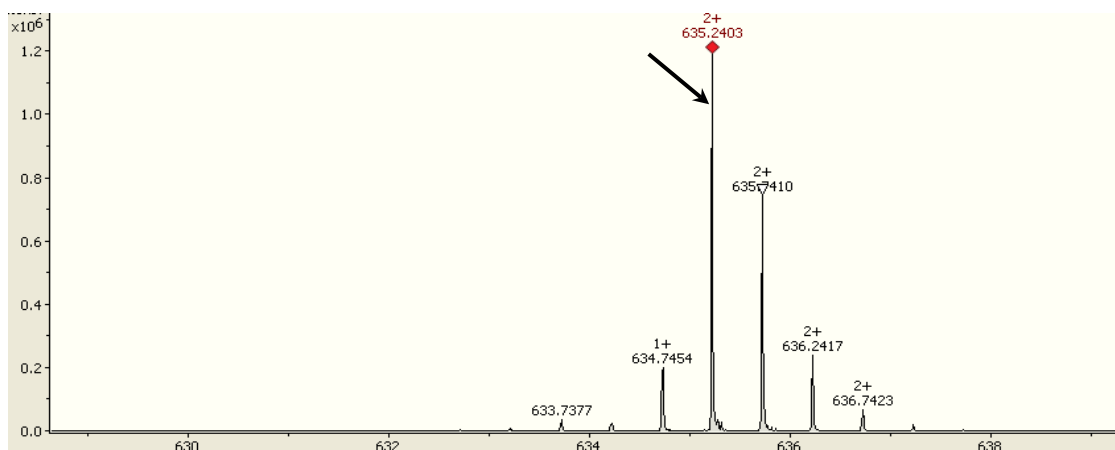

PIP27 (270-280) 1P 1Dea - 609.76 - charge 2 - Ions Score: 58

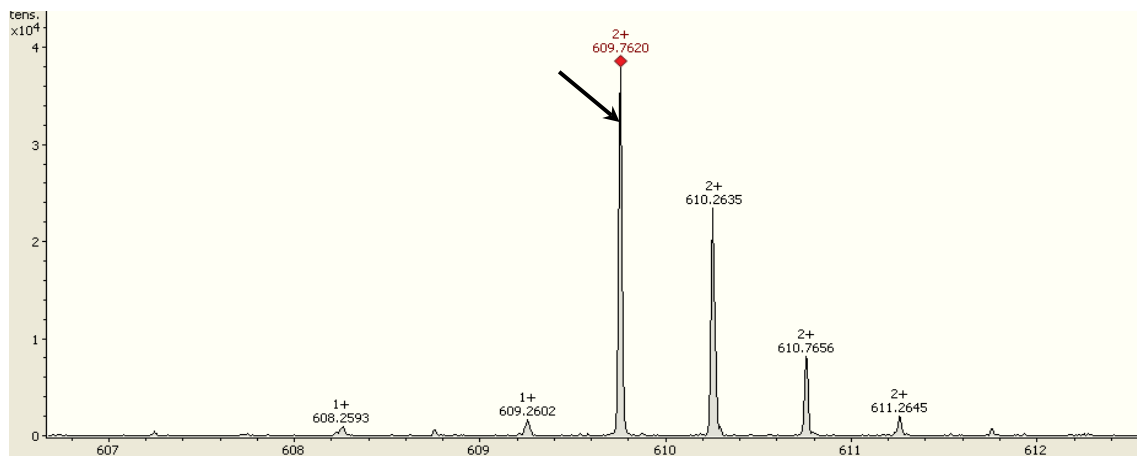

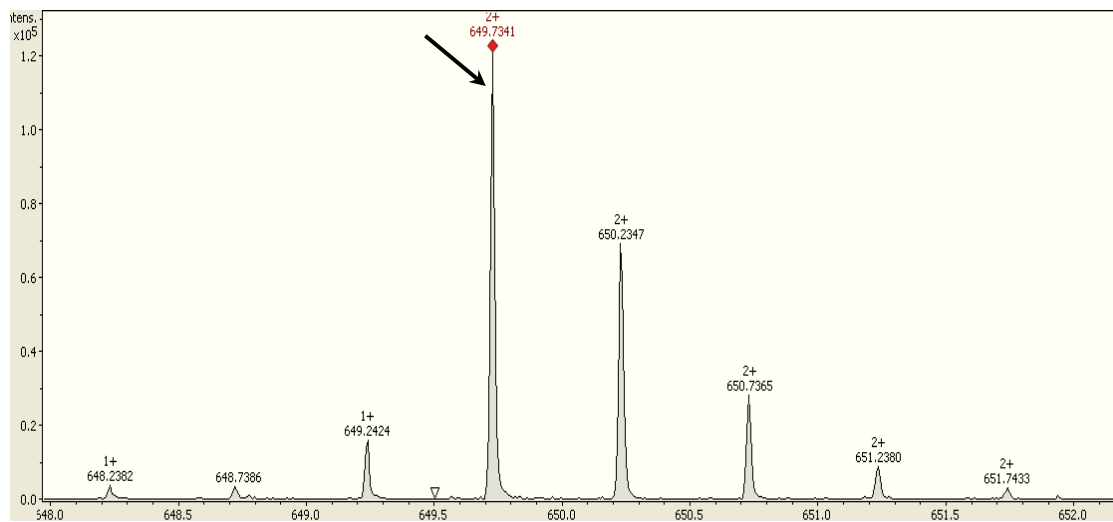

Supplement: supp_M113.028241_mcp.M113.028241-3.pdf [file supp_M113.028241_mcp.M113.028241-3.pdf]
