# Supplementary material
Source: PubMed Central journal article supplement (PMC3861731)
Supplement: supp_M113.028241_mcp.M113.028241-2.pdf [file supp_M113.028241_mcp.M113.028241-2.pdf]

# PIP11-14 Acet



Monoisotopic mass of neutral peptide Mr (calc): 1133.5023

Fixed modifications: Carbamidomethyl (C)

Variable modifications:

N-term: acetyl (Protein N-term)

**ions Score: 71**

**Bold red:** Matches

| # | b               | b <sup>++</sup> | b <sup>+</sup> | b <sup>+++</sup> | b <sup>0</sup> | b <sup>0++</sup> | Seq.     | y               | y <sup>++</sup> | y <sup>+</sup>  | y <sup>+++</sup> | y <sup>0</sup>  | y <sup>0++</sup> | # |
|---|-----------------|-----------------|----------------|------------------|----------------|------------------|----------|-----------------|-----------------|-----------------|------------------|-----------------|------------------|---|
| 1 | <b>174.0583</b> | 87.5328         |                |                  |                |                  | <b>M</b> |                 |                 |                 |                  |                 |                  | 9 |
| 2 | 303.1009        | 152.0541        |                |                  | 285.0903       | 143.0488         | <b>E</b> | <b>961.4585</b> | <b>481.2329</b> | 944.4320        | 472.7196         | <b>943.4479</b> | <b>472.2276</b>  | 8 |
| 3 | 360.1224        | 180.5648        |                |                  | 342.1118       | 171.5595         | <b>G</b> | <b>832.4159</b> | <b>416.7116</b> | 815.3894        | 408.1983         | <b>814.4054</b> | 407.7063         | 7 |
| 4 | 488.2173        | 244.6123        | 471.1908       | 236.0990         | 470.2068       | 235.6070         | <b>K</b> | <b>775.3945</b> | <b>388.2009</b> | <b>758.3679</b> | <b>379.6876</b>  | 757.3839        | 379.1956         | 6 |
| 5 | 617.2599        | 309.1336        | 600.2334       | 300.6203         | 599.2494       | 300.1283         | <b>E</b> | <b>647.2995</b> | 324.1534        | 630.2729        | 315.6401         | <b>629.2889</b> | 315.1481         | 5 |
| 6 | <b>746.3025</b> | 373.6549        | 729.2760       | 365.1416         | 728.2920       | 364.6496         | <b>E</b> | <b>518.2569</b> | 259.6321        | 501.2304        | 251.1188         | 500.2463        | 250.6268         | 4 |
| 7 | <b>861.3295</b> | 431.1684        | 844.3029       | 422.6551         | 843.3189       | 422.1631         | <b>D</b> | <b>389.2143</b> | 195.1108        | 372.1878        | 186.5975         | 371.2037        | <b>186.1055</b>  | 3 |
| 8 | 960.3979        | 480.7026        | 943.3713       | <b>472.1893</b>  | 942.3873       | 471.6973         | <b>V</b> | <b>274.1874</b> | 137.5973        | <b>257.1608</b> | 129.0840         |                 |                  | 2 |
| 9 |                 |                 |                |                  |                |                  | <b>R</b> | <b>175.1190</b> | 88.0631         | 158.0924        | 79.5498          |                 |                  | 1 |



Monoisotopic mass of neutral peptide Mr (calc): 1739.7880

Fixed modifications: Carbamidomethyl (C)

Variable modifications:

S10: Phospho (ST), with neutral losses 97.9769 (shown in table), 0.0000

**Ions Score: 40**

**Bold red:** Matches

| #  | b               | b <sup>++</sup> | b <sup>+</sup> | b <sup>+++</sup> | b <sup>0</sup> | b <sup>0++</sup> | Seq. | y               | y <sup>++</sup> | y <sup>+</sup>  | y <sup>+++</sup> | y <sup>0</sup>  | y <sup>0++</sup> | #  |
|----|-----------------|-----------------|----------------|------------------|----------------|------------------|------|-----------------|-----------------|-----------------|------------------|-----------------|------------------|----|
| 1  | 148.0757        | 74.5415         |                |                  |                |                  | F    |                 |                 |                 |                  |                 |                  | 15 |
| 2  | <b>245.1285</b> | 123.0679        |                |                  |                |                  | P    | 1495.7499       | <b>748.3786</b> | 1478.7234       | 739.8653         | 1477.7394       | <b>739.3733</b>  | 14 |
| 3  | 374.1710        | 187.5892        |                |                  | 356.1605       | 178.5839         | E    | 1398.6972       | <b>699.8522</b> | 1381.6706       | <b>691.3390</b>  | 1380.6866       | 690.8469         | 13 |
| 4  | 530.2722        | 265.6397        | 513.2456       | 257.1264         | 512.2616       | 256.6344         | R    | 1269.6546       | <b>635.3309</b> | 1252.6280       | 626.8177         | 1251.6440       | 626.3256         | 12 |
| 5  | <b>658.3307</b> | <b>329.6690</b> | 641.3042       | 321.1557         | 640.3202       | 320.6637         | Q    | 1113.5535       | 557.2804        | 1096.5269       | 548.7671         | 1095.5429       | <b>548.2751</b>  | 11 |
| 6  | 755.3835        | <b>378.1954</b> | 738.3570       | <b>369.6821</b>  | 737.3729       | 369.1901         | P    | <b>985.4949</b> | <b>493.2511</b> | 968.4683        | 484.7378         | 967.4843        | 484.2458         | 10 |
| 7  | <b>868.4676</b> | <b>434.7374</b> | 851.4410       | 426.2241         | 850.4570       | 425.7321         | I    | <b>888.4421</b> | 444.7247        | 871.4156        | 436.2114         | 870.4316        | 435.7194         | 9  |
| 8  | <b>925.4890</b> | <b>463.2482</b> | 908.4625       | 454.7349         | 907.4785       | 454.2429         | G    | <b>775.3581</b> | 388.1827        | 758.3315        | 379.6694         | 757.3475        | 379.1774         | 8  |
| 9  | 1026.5367       | 513.7720        | 1009.5102      | 505.2587         | 1008.5261      | 504.7667         | T    | <b>718.3366</b> | 359.6719        | 701.3101        | 351.1587         | 700.3260        | 350.6667         | 7  |
| 10 | 1095.5582       | <b>548.2827</b> | 1078.5316      | 539.7694         | 1077.5476      | 539.2774         | S    | <b>617.2889</b> | 309.1481        | 600.2624        | 300.6348         | 599.2784        | 300.1428         | 6  |
| 11 | 1166.5953       | 583.8013        | 1149.5687      | 575.2880         | 1148.5847      | 574.7960         | A    | <b>548.2675</b> | 274.6374        | 531.2409        | 266.1241         | 530.2569        | 265.6321         | 5  |
| 12 | 1294.6539       | 647.8306        | 1277.6273      | 639.3173         | 1276.6433      | 638.8253         | Q    | 477.2304        | 239.1188        | 460.2038        | 230.6055         | <b>459.2198</b> | 230.1135         | 4  |
| 13 | 1381.6859       | <b>691.3466</b> | 1364.6593      | 682.8333         | 1363.6753      | 682.3413         | S    | <b>349.1718</b> | 175.0895        | 332.1452        | 166.5763         | 331.1612        | 166.0842         | 3  |
| 14 | 1496.7128       | 748.8601        | 1479.6863      | 740.3468         | 1478.7023      | 739.8548         | D    | <b>262.1397</b> | 131.5735        | <b>245.1132</b> | 123.0602         | 244.1292        | 122.5682         | 2  |
| 15 |                 |                 |                |                  |                |                  | K    | 147.1128        | 74.0600         | 130.0863        | 65.5468          |                 |                  | 1  |



Monoisotopic mass of neutral peptide Mr (calc): 1739.7880

Fixed modifications: Carbamidomethyl (C)

Variable modifications:

S13: Phospho (ST), with neutral losses 97.9769 (shown in table), 0.0000

**Ions Score: 44**

**Red:** Matches

| #  | b               | b <sup>++</sup> | b <sup>*</sup>  | b <sup>+++</sup> | b <sup>0</sup> | b <sup>0++</sup> | Seq. | y               | y <sup>++</sup> | y <sup>*</sup>  | y <sup>+++</sup> | y <sup>0</sup> | y <sup>0++</sup> | #  |
|----|-----------------|-----------------|-----------------|------------------|----------------|------------------|------|-----------------|-----------------|-----------------|------------------|----------------|------------------|----|
| 1  | 148.0757        | 74.5415         |                 |                  |                |                  | F    |                 |                 |                 |                  |                |                  | 15 |
| 2  | 245.1285        | 123.0679        |                 |                  |                |                  | P    | 1495.7499       | <b>748.3786</b> | 1478.7234       | 739.8653         | 1477.7394      | <b>739.3733</b>  | 14 |
| 3  | 374.1710        | 187.5892        |                 |                  | 356.1605       | 178.5839         | E    | 1398.6972       | <b>699.8522</b> | 1381.6706       | 691.3390         | 1380.6866      | 690.8469         | 13 |
| 4  | <b>530.2722</b> | 265.6397        | 513.2456        | 257.1264         | 512.2616       | 256.6344         | R    | 1269.6546       | <b>635.3309</b> | 1252.6280       | 626.8177         | 1251.6440      | 626.3256         | 12 |
| 5  | <b>658.3307</b> | <b>329.6690</b> | <b>641.3042</b> | 321.1557         | 640.3202       | 320.6637         | Q    | 1113.5535       | 557.2804        | 1096.5269       | 548.7671         | 1095.5429      | <b>548.2751</b>  | 11 |
| 6  | 755.3835        | <b>378.1954</b> | 738.3570        | 369.6821         | 737.3729       | 369.1901         | P    | <b>985.4949</b> | <b>493.2511</b> | 968.4683        | 484.7378         | 967.4843       | 484.2458         | 10 |
| 7  | 868.4676        | <b>434.7374</b> | 851.4410        | 426.2241         | 850.4570       | 425.7321         | I    | <b>888.4421</b> | 444.7247        | 871.4156        | 436.2114         | 870.4316       | 435.7194         | 9  |
| 8  | 925.4890        | 463.2482        | 908.4625        | 454.7349         | 907.4785       | 454.2429         | G    | <b>775.3581</b> | 388.1827        | 758.3315        | 379.6694         | 757.3475       | 379.1774         | 8  |
| 9  | 1026.5367       | 513.7720        | 1009.5102       | 505.2587         | 1008.5261      | 504.7667         | T    | <b>718.3366</b> | 359.6719        | 701.3101        | 351.1587         | 700.3260       | 350.6667         | 7  |
| 10 | 1113.5687       | 557.2880        | 1096.5422       | 548.7747         | 1095.5582      | <b>548.2827</b>  | S    | <b>617.2889</b> | <b>309.1481</b> | 600.2624        | 300.6348         | 599.2784       | 300.1428         | 6  |
| 11 | 1184.6058       | 592.8066        | 1167.5793       | 584.2933         | 1166.5953      | 583.8013         | A    | <b>530.2569</b> | 265.6321        | 513.2303        | 257.1188         | 512.2463       | 256.6268         | 5  |
| 12 | 1312.6644       | 656.8359        | 1295.6379       | 648.3226         | 1294.6539      | 647.8306         | Q    | <b>459.2198</b> | 230.1135        | <b>442.1932</b> | 221.6003         | 441.2092       | 221.1082         | 4  |
| 13 | 1381.6859       | 691.3466        | 1364.6593       | 682.8333         | 1363.6753      | 682.3413         | S    | 331.1612        | 166.0842        | 314.1347        | 157.5710         | 313.1506       | 157.0790         | 3  |
| 14 | 1496.7128       | 748.8601        | 1479.6863       | 740.3468         | 1478.7023      | 739.8548         | D    | 262.1397        | 131.5735        | 245.1132        | 123.0602         | 244.1292       | 122.5682         | 2  |
| 15 |                 |                 |                 |                  |                |                  | K    | 147.1128        | 74.0600         | 130.0863        | 65.5468          |                |                  | 1  |



Monoisotopic mass of neutral peptide Mr (calc): 1740.7720

Fixed modifications: Carbamidomethyl (C)

Variable modifications:

Q5: deamidated (NQ)

S10: Phospho (ST), with neutral losses 97.9769 (shown in table), 0.0000

Ions Score: 28

**Bold red:** Matches

| #  | b               | b <sup>++</sup> | b*        | b <sup>*++</sup> | b <sup>0</sup> | b <sup>0++</sup> | Seq. | y               | y <sup>++</sup> | y*        | y <sup>*++</sup> | y <sup>0</sup>  | y <sup>0++</sup> | #  |
|----|-----------------|-----------------|-----------|------------------|----------------|------------------|------|-----------------|-----------------|-----------|------------------|-----------------|------------------|----|
| 1  | 148.0757        | 74.5415         |           |                  |                |                  | F    |                 |                 |           |                  |                 |                  | 15 |
| 2  | 245.1285        | 123.0679        |           |                  |                |                  | P    | 1496.7339       | <b>748.8706</b> | 1479.7074 | 740.3573         | 1478.7234       | <b>739.8653</b>  | 14 |
| 3  | 374.1710        | 187.5892        |           |                  | 356.1605       | 178.5839         | E    | 1399.6812       | <b>700.3442</b> | 1382.6546 | 691.8310         | 1381.6706       | <b>691.3389</b>  | 13 |
| 4  | <b>530.2722</b> | 265.6397        | 513.2456  | 257.1264         | 512.2616       | 256.6344         | R    | 1270.6386       | <b>635.8229</b> | 1253.6120 | 627.3097         | 1252.6280       | 626.8177         | 12 |
| 5  | <b>659.3147</b> | <b>330.1610</b> | 642.2882  | 321.6477         | 641.3042       | 321.1557         | Q    | 1114.5375       | 557.7724        | 1097.5109 | 549.2591         | 1096.5269       | 548.7671         | 11 |
| 6  | <b>756.3675</b> | <b>378.6874</b> | 739.3410  | <b>370.1741</b>  | 738.3569       | 369.6821         | P    | 985.4949        | <b>493.2511</b> | 968.4683  | 484.7378         | <b>967.4843</b> | 484.2458         | 10 |
| 7  | <b>869.4516</b> | 435.2294        | 852.4250  | 426.7162         | 851.4410       | 426.2241         | I    | 888.4421        | 444.7247        | 871.4156  | 436.2114         | 870.4316        | 435.7194         | 9  |
| 8  | <b>926.4730</b> | <b>463.7402</b> | 909.4465  | 455.2269         | 908.4625       | 454.7349         | G    | <b>775.3581</b> | 388.1827        | 758.3315  | 379.6694         | 757.3475        | 379.1774         | 8  |
| 9  | 1027.5207       | 514.2640        | 1010.4942 | 505.7507         | 1009.5102      | 505.2587         | T    | <b>718.3366</b> | 359.6719        | 701.3101  | 351.1587         | <b>700.3260</b> | 350.6667         | 7  |
| 10 | 1096.5422       | 548.7747        | 1079.5156 | 540.2614         | 1078.5316      | 539.7694         | S    | <b>617.2889</b> | 309.1481        | 600.2624  | 300.6348         | 599.2784        | 300.1428         | 6  |
| 11 | 1167.5793       | 584.2933        | 1150.5527 | 575.7800         | 1149.5687      | 575.2880         | A    | <b>548.2675</b> | 274.6374        | 531.2409  | 266.1241         | <b>530.2569</b> | 265.6321         | 5  |
| 12 | 1295.6379       | 648.3226        | 1278.6113 | 639.8093         | 1277.6273      | 639.3173         | Q    | 477.2304        | 239.1188        | 460.2038  | 230.6055         | <b>459.2198</b> | 230.1135         | 4  |
| 13 | 1382.6699       | 691.8386        | 1365.6433 | 683.3253         | 1364.6593      | 682.8333         | S    | 349.1718        | 175.0895        | 332.1452  | 166.5763         | 331.1612        | 166.0842         | 3  |
| 14 | 1497.6968       | 749.3521        | 1480.6703 | 740.8388         | 1479.6863      | 740.3468         | D    | 262.1397        | 131.5735        | 245.1132  | 123.0602         | 244.1292        | 122.5682         | 2  |
| 15 |                 |                 |           |                  |                |                  | K    | 147.1128        | 74.0600         | 130.0863  | 65.5468          |                 |                  | 1  |



Monoisotopic mass of neutral peptide Mr (calc): 1740.7720

Fixed modifications: Carbamidomethyl (C)

Variable modifications:

Q5: deamidated (NQ)

S13: Phospho (ST), with neutral losses 97.9769 (shown in table), 0.0000

**Ions Score: 28**

**Bold red:** Matches

| #  | b               | b <sup>++</sup> | b <sup>+</sup> | b <sup>+++</sup> | b <sup>0</sup> | b <sup>0++</sup> | Seq. | y               | y <sup>++</sup> | y <sup>+</sup> | y <sup>+++</sup> | y <sup>0</sup>  | y <sup>0++</sup> | #  |
|----|-----------------|-----------------|----------------|------------------|----------------|------------------|------|-----------------|-----------------|----------------|------------------|-----------------|------------------|----|
| 1  | 148.0757        | 74.5415         |                |                  |                |                  | F    |                 |                 |                |                  |                 |                  | 15 |
| 2  | 245.1285        | 123.0679        |                |                  |                |                  | P    | 1496.7339       | <b>748.8706</b> | 1479.7074      | 740.3573         | 1478.7234       | <b>739.8653</b>  | 14 |
| 3  | 374.1710        | 187.5892        |                |                  | 356.1605       | 178.5839         | E    | 1399.6812       | <b>700.3442</b> | 1382.6546      | 691.8310         | 1381.6706       | <b>691.3389</b>  | 13 |
| 4  | <b>530.2722</b> | 265.6397        | 513.2456       | 257.1264         | 512.2616       | 256.6344         | R    | 1270.6386       | <b>635.8229</b> | 1253.6120      | 627.3097         | 1252.6280       | 626.8177         | 12 |
| 5  | <b>659.3147</b> | <b>330.1610</b> | 642.2882       | 321.6477         | 641.3042       | 321.1557         | Q    | 1114.5375       | 557.7724        | 1097.5109      | 549.2591         | 1096.5269       | 548.7671         | 11 |
| 6  | <b>756.3675</b> | <b>378.6874</b> | 739.3410       | <b>370.1741</b>  | 738.3569       | 369.6821         | P    | 985.4949        | <b>493.2511</b> | 968.4683       | 484.7378         | <b>967.4843</b> | 484.2458         | 10 |
| 7  | <b>869.4516</b> | 435.2294        | 852.4250       | 426.7162         | 851.4410       | 426.2241         | I    | 888.4421        | 444.7247        | 871.4156       | 436.2114         | 870.4316        | 435.7194         | 9  |
| 8  | <b>926.4730</b> | <b>463.7402</b> | 909.4465       | 455.2269         | 908.4625       | 454.7349         | G    | <b>775.3581</b> | 388.1827        | 758.3315       | 379.6694         | 757.3475        | 379.1774         | 8  |
| 9  | 1027.5207       | 514.2640        | 1010.4942      | 505.7507         | 1009.5102      | 505.2587         | T    | <b>718.3366</b> | 359.6719        | 701.3101       | 351.1587         | <b>700.3260</b> | 350.6667         | 7  |
| 10 | 1114.5527       | 557.7800        | 1097.5262      | 549.2667         | 1096.5422      | 548.7747         | S    | <b>617.2889</b> | 309.1481        | 600.2624       | 300.6348         | 599.2784        | 300.1428         | 6  |
| 11 | 1185.5899       | 593.2986        | 1168.5633      | 584.7853         | 1167.5793      | 584.2933         | A    | <b>530.2569</b> | 265.6321        | 513.2303       | 257.1188         | 512.2463        | 256.6268         | 5  |
| 12 | 1313.6484       | 657.3279        | 1296.6219      | 648.8146         | 1295.6379      | 648.3226         | Q    | <b>459.2198</b> | 230.1135        | 442.1932       | 221.6003         | 441.2092        | 221.1082         | 4  |
| 13 | 1382.6699       | 691.8386        | 1365.6433      | 683.3253         | 1364.6593      | 682.8333         | S    | 331.1612        | 166.0842        | 314.1347       | 157.5710         | 313.1506        | 157.0790         | 3  |
| 14 | 1497.6968       | 749.3521        | 1480.6703      | 740.8388         | 1479.6863      | 740.3468         | D    | 262.1397        | 131.5735        | 245.1132       | 123.0602         | 244.1292        | 122.5682         | 2  |
| 15 |                 |                 |                |                  |                |                  | K    | 147.1128        | 74.0600         | 130.0863       | 65.5468          |                 |                  | 1  |



Monoisotopic mass of neutral peptide Mr (calc): 1193.4966

Fixed modifications: Carbamidomethyl (C)

Variable modifications:

N-term: Gln →pyro-Glu (N-termQ)

S9: Phospho (ST), with neutral losses 97.9769 (shown in table), 0.0000

**Ions Score: 56**

**Bold red:** Matches

| #  | b               | b <sup>++</sup> | b <sup>±</sup> | b <sup>±++</sup> | b <sup>0</sup> | b <sup>0++</sup> | Seq. | y               | y <sup>++</sup> | y <sup>±</sup>  | y <sup>±++</sup> | y <sup>0</sup>  | y <sup>0++</sup> | #  |
|----|-----------------|-----------------|----------------|------------------|----------------|------------------|------|-----------------|-----------------|-----------------|------------------|-----------------|------------------|----|
| 1  | 112.0393        | 56.5233         | 95.0128        | 48.0100          |                |                  | Q    |                 |                 |                 |                  |                 |                  | 11 |
| 2  | <b>209.0921</b> | 105.0497        | 192.0655       | 96.5364          |                |                  | P    | 985.4949        | 493.2511        | 968.4683        | 484.7378         | 967.4843        | 484.2458         | 10 |
| 3  | 322.1761        | 161.5917        | 305.1496       | 153.0784         |                |                  | I    | <b>888.4421</b> | 444.7247        | 871.4156        | 436.2114         | 870.4316        | <b>435.7194</b>  | 9  |
| 4  | <b>379.1976</b> | 190.1024        | 362.1711       | 181.5892         |                |                  | G    | <b>775.3581</b> | 388.1827        | 758.3315        | 379.6694         | <b>757.3475</b> | <b>379.1774</b>  | 8  |
| 5  | 480.2453        | 240.6263        | 463.2187       | 232.1130         | 462.2347       | 231.6210         | T    | <b>718.3366</b> | 359.6719        | 701.3101        | 351.1587         | 700.3260        | 350.6667         | 7  |
| 6  | 567.2773        | 284.1423        | 550.2508       | 275.6290         | 549.2668       | 275.1370         | S    | <b>617.2889</b> | 309.1481        | 600.2624        | 300.6348         | 599.2784        | 300.1428         | 6  |
| 7  | 638.3144        | 319.6609        | 621.2879       | 311.1476         | 620.3039       | 310.6556         | A    | <b>530.2569</b> | 265.6321        | 513.2303        | 257.1188         | 512.2463        | 256.6268         | 5  |
| 8  | 766.3730        | 383.6901        | 749.3465       | 375.1769         | 748.3624       | 374.6849         | Q    | <b>459.2198</b> | 230.1135        | <b>442.1932</b> | 221.6003         | 441.2092        | 221.1082         | 4  |
| 9  | 835.3945        | 418.2009        | 818.3679       | 409.6876         | 817.3839       | 409.1956         | S    | <b>331.1612</b> | 166.0842        | 314.1347        | 157.5710         | 313.1506        | 157.0790         | 3  |
| 10 | 950.4214        | 475.7143        | 933.3949       | 467.2011         | 932.4108       | 466.7091         | D    | 262.1397        | 131.5735        | 245.1132        | 123.0602         | 244.1292        | 122.5682         | 2  |
| 11 |                 |                 |                |                  |                |                  | K    | 147.1128        | 74.0600         | 130.0863        | 65.5468          |                 |                  | 1  |

# PIP21 (4-16) 1Dea



Monoisotopic mass of neutral peptide Mr (calc): 1404.6521

Fixed modifications: Carbamidomethyl (C)

Variable modifications:

Q11: Deamidated (NQ)

**Ions Score: 51**

**Bold red:** Matches

| #  | b               | b <sup>++</sup> | b <sup>*</sup> | b <sup>+++</sup> | b <sup>0</sup> | b <sup>0++</sup> | Seq. | y               | y <sup>++</sup> | y <sup>*</sup>  | y <sup>+++</sup> | y <sup>0</sup>  | y <sup>0++</sup> | #  |
|----|-----------------|-----------------|----------------|------------------|----------------|------------------|------|-----------------|-----------------|-----------------|------------------|-----------------|------------------|----|
| 1  | 116.0342        | 58.5207         |                |                  | 98.0237        | 49.5155          | D    |                 |                 |                 |                  |                 |                  | 13 |
| 2  | <b>215.1026</b> | 108.0550        |                |                  | 197.0921       | 99.0497          | V    | 1290.6325       | 645.8199        | 1273.6059       | 637.3066         | 1272.6219       | 636.8146         | 12 |
| 3  | <b>344.1452</b> | 172.5763        |                |                  | 326.1347       | 163.5710         | E    | 1191.5640       | 596.2857        | 1174.5375       | 587.7724         | 1173.5535       | 587.2804         | 11 |
| 4  | <b>415.1823</b> | 208.0948        |                |                  | 397.1718       | 199.0895         | A    | 1062.5214       | 531.7644        | 1045.4949       | 523.2511         | 1044.5109       | 522.7591         | 10 |
| 5  | 514.2508        | 257.6290        |                |                  | 496.2402       | 248.6237         | V    | 991.4843        | 496.2458        | 974.4578        | 487.7325         | 973.4738        | 487.2405         | 9  |
| 6  | 611.3035        | 306.1554        |                |                  | 593.2930       | 297.1501         | P    | <b>892.4159</b> | <b>446.7116</b> | 875.3894        | 438.1983         | 874.4054        | 437.7063         | 8  |
| 7  | 668.3250        | 334.6661        |                |                  | 650.3144       | 325.6608         | G    | <b>795.3632</b> | 398.1852        | 778.3366        | 389.6719         | 777.3526        | 389.1799         | 7  |
| 8  | 797.3676        | 399.1874        |                |                  | 779.3570       | 390.1821         | E    | <b>738.3417</b> | 369.6745        | <b>721.3151</b> | 361.1612         | <b>720.3311</b> | 360.6692         | 6  |
| 9  | 854.3890        | 427.6982        |                |                  | 836.3785       | 418.6929         | G    | <b>609.2991</b> | 305.1532        | 592.2725        | 296.6399         | 591.2885        | 296.1479         | 5  |
| 10 | 1001.4575       | 501.2324        |                |                  | 983.4469       | 492.2271         | F    | <b>552.2776</b> | 276.6425        | 535.2511        | 268.1292         | 534.2671        | 267.6372         | 4  |
| 11 | 1130.5000       | 565.7537        | 1113.4735      | 557.2404         | 1112.4895      | 556.7484         | Q    | 405.2092        | 203.1082        | 388.1827        | 194.5950         | 387.1987        | 194.1030         | 3  |
| 12 | 1231.5477       | 616.2775        | 1214.5212      | 607.7642         | 1213.5372      | 607.2722         | T    | <b>276.1666</b> | 138.5870        | 259.1401        | 130.0737         | 258.1561        | 129.5817         | 2  |
| 13 |                 |                 |                |                  |                |                  | R    | 175.1190        | 88.0631         | 158.0924        | 79.5498          |                 |                  | 1  |

# PIP22 (4-14) 1Dea



Monoisotopic mass of neutral peptide  $M_r$  (calc): 1234.5466

Fixed modifications: Carbamidomethyl (C)

Variable modifications:

Q9: Deamidated (NQ)

**Ions Score: 68**

**Red**: Matches

| #  | b               | b <sup>++</sup> | b <sup>+</sup> | b <sup>+++</sup> | b <sup>0</sup>  | b <sup>0++</sup> | Seq. | y                | y <sup>++</sup> | y <sup>+</sup> | y <sup>+++</sup> | y <sup>0</sup> | y <sup>0++</sup> | #  |
|----|-----------------|-----------------|----------------|------------------|-----------------|------------------|------|------------------|-----------------|----------------|------------------|----------------|------------------|----|
| 1  | 116.0342        | 58.5207         |                |                  | 98.0237         | 49.5155          | D    |                  |                 |                |                  |                |                  | 11 |
| 2  | <b>215.1026</b> | 108.0550        |                |                  | 197.0921        | 99.0497          | V    | 1120.5269        | 560.7671        | 1103.5004      | <b>552.2538</b>  | 1102.5164      | 551.7618         | 10 |
| 3  | 344.1452        | 172.5763        |                |                  | 326.1347        | 163.5710         | E    | <b>1021.4585</b> | 511.2329        | 1004.4320      | 502.7196         | 1003.4479      | 502.2276         | 9  |
| 4  | 401.1667        | 201.0870        |                |                  | 383.1561        | 192.0817         | G    | <b>892.4159</b>  | 446.7116        | 875.3894       | 438.1983         | 874.4054       | 437.7063         | 8  |
| 5  | 498.2195        | 249.6134        |                |                  | 480.2089        | 240.6081         | P    | <b>835.3945</b>  | <b>418.2009</b> | 818.3679       | 409.6876         | 817.3839       | <b>409.1956</b>  | 7  |
| 6  | 627.2620        | 314.1347        |                |                  | <b>609.2515</b> | 305.1294         | E    | <b>738.3417</b>  | 369.6745        | 721.3151       | 361.1612         | 720.3311       | 360.6692         | 6  |
| 7  | 684.2835        | 342.6454        |                |                  | 666.2729        | 333.6401         | G    | <b>609.2991</b>  | 305.1532        | 592.2725       | 296.6399         | 591.2885       | 296.1479         | 5  |
| 8  | 831.3519        | 416.1796        |                |                  | 813.3414        | 407.1743         | F    | <b>552.2776</b>  | 276.6425        | 535.2511       | 268.1292         | 534.2671       | 267.6372         | 4  |
| 9  | 960.3945        | 480.7009        | 943.3680       | 472.1876         | 942.3839        | 471.6956         | Q    | 405.2092         | 203.1082        | 388.1827       | 194.5950         | 387.1987       | 194.1030         | 3  |
| 10 | 1061.4422       | 531.2247        | 1044.4156      | 522.7115         | 1043.4316       | 522.2195         | T    | <b>276.1666</b>  | 138.5870        | 259.1401       | 130.0737         | 258.1561       | 129.5817         | 2  |
| 11 |                 |                 |                |                  |                 |                  | R    | 175.1190         | 88.0631         | 158.0924       | 79.5498          |                |                  | 1  |

# PIP24 (4-16) 1Dea



Monoisotopic mass of neutral peptide Mr (calc): 1340.6208

Fixed modifications: Carbamidomethyl (C)

Variable modifications:

N5: Deamidated (NQ)

**Ions Score: 56**

**Red**: Matches

| #  | b               | b <sup>++</sup> | b <sup>+</sup> | b <sup>+++</sup> | b <sup>0</sup> | b <sup>0++</sup> | Seq. | y                | y <sup>++</sup> | y <sup>+</sup>  | y <sup>+++</sup> | y <sup>0</sup>  | y <sup>0++</sup> | #  |
|----|-----------------|-----------------|----------------|------------------|----------------|------------------|------|------------------|-----------------|-----------------|------------------|-----------------|------------------|----|
| 1  | 116.0342        | 58.5207         |                |                  | 98.0237        | 49.5155          | D    |                  |                 |                 |                  |                 |                  | 13 |
| 2  | <b>229.1183</b> | 115.0628        |                |                  | 211.1077       | 106.0575         | L    | 1226.6012        | 613.8042        | 1209.5746       | 605.2909         | 1208.5906       | 604.7989         | 12 |
| 3  | <b>344.1452</b> | 172.5763        |                |                  | 326.1347       | 163.5710         | D    | <b>1113.5171</b> | 557.2622        | 1096.4905       | 548.7489         | 1095.5065       | 548.2569         | 11 |
| 4  | 443.2136        | 222.1105        |                |                  | 425.2031       | 213.1052         | V    | <b>998.4901</b>  | 499.7487        | 981.4636        | 491.2354         | 980.4796        | 490.7434         | 10 |
| 5  | 558.2406        | 279.6239        | 541.2140       | 271.1107         | 540.2300       | 270.6186         | N    | <b>899.4217</b>  | 450.2145        | 882.3952        | 441.7012         | 881.4112        | 441.2092         | 9  |
| 6  | 687.2832        | <b>344.1452</b> | 670.2566       | 335.6319         | 669.2726       | 335.1399         | E    | <b>784.3948</b>  | 392.7010        | 767.3682        | 384.1878         | <b>766.3842</b> | 383.6958         | 8  |
| 7  | 774.3152        | 387.6612        | 757.2886       | 379.1480         | 756.3046       | 378.6560         | S    | <b>655.3522</b>  | 328.1797        | 638.3257        | 319.6665         | 637.3416        | 319.1745         | 7  |
| 8  | 831.3367        | 416.1720        | 814.3101       | 407.6587         | 813.3261       | 407.1667         | G    | <b>568.3202</b>  | 284.6637        | 551.2936        | 276.1504         |                 |                  | 6  |
| 9  | 928.3894        | 464.6984        | 911.3629       | 456.1851         | 910.3789       | 455.6931         | P    | <b>511.2987</b>  | 256.1530        | 494.2722        | 247.6397         |                 |                  | 5  |
| 10 | 1025.4422       | 513.2247        | 1008.4156      | 504.7115         | 1007.4316      | 504.2195         | P    | <b>414.2459</b>  | 207.6266        | 397.2194        | 199.1133         |                 |                  | 4  |
| 11 | 1096.4793       | 548.7433        | 1079.4528      | 540.2300         | 1078.4687      | 539.7380         | A    | 317.1932         | 159.1002        | 300.1666        | 150.5870         |                 |                  | 3  |
| 12 | 1167.5164       | 584.2618        | 1150.4899      | 575.7486         | 1149.5059      | 575.2566         | A    | 246.1561         | 123.5817        | <b>229.1295</b> | 115.0684         |                 |                  | 2  |
| 13 |                 |                 |                |                  |                |                  | R    | 175.1190         | 88.0631         | 158.0924        | 79.5498          |                 |                  | 1  |

# PIP24 (4-19) 1P



Monoisotopic mass of neutral peptide Mr (calc): 1419.6031

Fixed modifications: Carbamidomethyl (C)

Variable modifications:

S7: Phospho (ST), with neutral losses 97.9769 (shown in table), 0.0000

**Ions Score: 70**

**Bold red:** Matches

| #  | b                | b <sup>++</sup> | b <sup>*</sup>   | b <sup>+++</sup> | b <sup>0</sup>  | b <sup>0++</sup> | Seq. | y                | y <sup>++</sup> | y <sup>*</sup>   | y <sup>+++</sup> | y <sup>0</sup> | y <sup>0++</sup> | #  |
|----|------------------|-----------------|------------------|------------------|-----------------|------------------|------|------------------|-----------------|------------------|------------------|----------------|------------------|----|
| 1  | 116.0342         | 58.5207         |                  |                  | 98.0237         | 49.5155          | D    |                  |                 |                  |                  |                |                  | 13 |
| 2  | 229.1183         | 115.0628        |                  |                  | 211.1077        | 106.0575         | L    | 1207.6066        | 604.3069        | 1190.5800        | 595.7936         | 1189.5960      | 595.3016         | 12 |
| 3  | <b>344.1452</b>  | 172.5763        |                  |                  | 326.1347        | 163.5710         | D    | <b>1094.5225</b> | 547.7649        | <b>1077.4960</b> | <b>539.2516</b>  | 1076.5119      | 538.7596         | 11 |
| 4  | <b>443.2136</b>  | 222.1105        |                  |                  | 425.2031        | 213.1052         | V    | <b>979.4956</b>  | 490.2514        | 962.4690         | 481.7381         | 961.4850       | 481.2461         | 10 |
| 5  | 557.2566         | 279.1319        | 540.2300         | 270.6186         | <b>539.2460</b> | 270.1266         | N    | <b>880.4271</b>  | 440.7172        | 863.4006         | 432.2039         | 862.4166       | 431.7119         | 9  |
| 6  | 686.2992         | 343.6532        | 669.2726         | 335.1399         | 668.2886        | 334.6479         | E    | <b>766.3842</b>  | 383.6957        | 749.3577         | 375.1825         | 748.3737       | 374.6905         | 8  |
| 7  | 755.3206         | 378.1639        | 738.2941         | 369.6507         | 737.3101        | 369.1587         | S    | <b>637.3416</b>  | 319.1745        | 620.3151         | 310.6612         | 619.3311       | 310.1692         | 7  |
| 8  | 812.3421         | 406.6747        | 795.3155         | 398.1614         | 794.3315        | 397.6694         | G    | <b>568.3202</b>  | 284.6637        | 551.2936         | 276.1504         |                |                  | 6  |
| 9  | 909.3948         | 455.2011        | 892.3683         | 446.6878         | 891.3843        | 446.1958         | P    | <b>511.2987</b>  | 256.1530        | 494.2722         | 247.6397         |                |                  | 5  |
| 10 | 1006.4476        | 503.7274        | 989.4211         | 495.2142         | 988.4370        | 494.7222         | P    | <b>414.2459</b>  | 207.6266        | 397.2194         | 199.1133         |                |                  | 4  |
| 11 | <b>1077.4847</b> | <b>539.2460</b> | <b>1060.4582</b> | 530.7327         | 1059.4742       | 530.2407         | A    | <b>317.1932</b>  | 159.1002        | 300.1666         | 150.5870         |                |                  | 3  |
| 12 | 1148.5218        | 574.7646        | 1131.4953        | 566.2513         | 1130.5113       | 565.7593         | A    | <b>246.1561</b>  | 123.5817        | 229.1295         | 115.0684         |                |                  | 2  |
| 13 |                  |                 |                  |                  |                 |                  | R    | 175.1190         | 88.0631         | 158.0924         | 79.5498          |                |                  | 1  |

# PIP21 (17-33) 1Dea



Monoisotopic mass of neutral peptide Mr (calc): 1740.7720

Fixed modifications: Carbamidomethyl (C)

Variable modifications:

Q3: deamidated (NQ)

**Ions Score: 44**

**Bold red:** Matches

| #  | b               | b <sup>++</sup> | b <sup>*</sup> | b <sup>*++</sup> | b <sup>0</sup>  | b <sup>0++</sup> | Seq.     | y                | y <sup>++</sup> | y <sup>*</sup> | y <sup>*++</sup> | y <sup>0</sup>  | y <sup>0++</sup> | #  |
|----|-----------------|-----------------|----------------|------------------|-----------------|------------------|----------|------------------|-----------------|----------------|------------------|-----------------|------------------|----|
| 1  | 116.0342        | 58.5207         |                |                  | 98.0237         | 49.5155          | <b>D</b> |                  |                 |                |                  |                 |                  | 17 |
| 2  | <b>279.0975</b> | 140.0524        |                |                  | 261.0870        | 131.0471         | <b>Y</b> | 1758.8585        | 879.9329        | 1741.8319      | 871.4196         | 1740.8479       | 870.9276         | 16 |
| 3  | <b>408.1401</b> | 204.5737        | 391.1136       | 196.0604         | <b>390.1296</b> | 195.5684         | <b>Q</b> | 1595.7952        | 798.4012        | 1578.7686      | 789.8879         | 1577.7846       | 789.3959         | 15 |
| 4  | <b>523.1671</b> | 262.0872        | 506.1405       | 253.5739         | <b>505.1565</b> | 253.0819         | <b>D</b> | 1466.7526        | <b>733.8799</b> | 1449.7260      | 725.3667         | 1448.7420       | 724.8746         | 14 |
| 5  | <b>620.2198</b> | 310.6136        | 603.1933       | 302.1003         | 602.2093        | 301.6083         | <b>P</b> | <b>1351.7256</b> | <b>676.3665</b> | 1334.6991      | 667.8532         | 1333.7151       | 667.3612         | 13 |
| 6  | <b>717.2726</b> | 359.1399        | 700.2461       | 350.6267         | 699.2620        | 350.1347         | <b>P</b> | <b>1254.6729</b> | <b>627.8401</b> | 1237.6463      | 619.3268         | 1236.6623       | 618.8348         | 12 |
| 7  | 814.3254        | 407.6663        | 797.2988       | 399.1530         | 796.3148        | 398.6610         | <b>P</b> | <b>1157.6201</b> | <b>579.3137</b> | 1140.5936      | 570.8004         | 1139.6095       | 570.3084         | 11 |
| 8  | 885.3625        | 443.1849        | 868.3359       | 434.6716         | 867.3519        | 434.1796         | <b>A</b> | 1060.5673        | 530.7873        | 1043.5408      | 522.2740         | 1042.5568       | 521.7820         | 10 |
| 9  | 982.4152        | 491.7113        | 965.3887       | 483.1980         | 964.4047        | 482.7060         | <b>P</b> | <b>989.5302</b>  | <b>495.2688</b> | 972.5037       | 486.7555         | 971.5197        | 486.2635         | 9  |
| 10 | 1129.4837       | 565.2455        | 1112.4571      | 556.7322         | 1111.4731       | 556.2402         | <b>F</b> | 892.4775         | 446.7424        | 875.4509       | 438.2291         | 874.4669        | 437.7371         | 8  |
| 11 | 1242.5677       | 621.7875        | 1225.5412      | 613.2742         | 1224.5572       | 612.7822         | <b>I</b> | 745.4090         | 373.2082        | 728.3825       | 364.6949         | 727.3985        | 364.2029         | 7  |
| 12 | 1357.5947       | 679.3010        | 1340.5681      | 670.7877         | 1339.5841       | 670.2957         | <b>D</b> | <b>632.3250</b>  | 316.6661        | 615.2984       | 308.1529         | 614.3144        | 307.6608         | 6  |
| 13 | 1414.6161       | 707.8117        | 1397.5896      | 699.2984         | 1396.6056       | 698.8064         | <b>G</b> | <b>517.2980</b>  | 259.1527        | 500.2715       | 250.6394         | 499.2875        | 250.1474         | 5  |
| 14 | 1485.6532       | 743.3303        | 1468.6267      | 734.8170         | 1467.6427       | 734.3250         | <b>A</b> | 460.2766         | 230.6419        | 443.2500       | 222.1287         | 442.2660        | 221.6366         | 4  |
| 15 | 1614.6958       | 807.8516        | 1597.6693      | 799.3383         | 1596.6853       | 798.8463         | <b>E</b> | <b>389.2395</b>  | <b>195.1234</b> | 372.2129       | 186.6101         | <b>371.2289</b> | 186.1181         | 3  |
| 16 | 1727.7799       | 864.3936        | 1710.7534      | 855.8803         | 1709.7693       | 855.3883         | <b>L</b> | <b>260.1969</b>  | 130.6021        | 243.1703       | 122.0888         |                 |                  | 2  |
| 17 |                 |                 |                |                  |                 |                  | <b>K</b> | <b>147.1128</b>  | 74.0600         | 130.0863       | 65.5468          |                 |                  | 1  |



Monoisotopic mass of neutral peptide Mr (calc): 1740.7720

Fixed modifications: Carbamidomethyl (C)

Variable modifications:

T8: Phospho (ST), with neutral losses 97.9769 (shown in table), 0.0000

**Ions Score: 36**

**Bold red:** Matches

| #  | b               | b <sup>++</sup> | b <sup>0</sup> | b <sup>0++</sup> | Seq. | y                | y <sup>++</sup> | y <sup>*</sup> | y <sup>+++</sup> | y <sup>0</sup> | y <sup>0++</sup> | #  |
|----|-----------------|-----------------|----------------|------------------|------|------------------|-----------------|----------------|------------------|----------------|------------------|----|
| 1  | 116.0342        | 58.5207         | 98.0237        | 49.5155          | D    |                  |                 |                |                  |                |                  | 18 |
| 2  | <b>279.0975</b> | 140.0524        | 261.0870       | 131.0471         | Y    | 1963.8960        | 982.4516        | 1946.8694      | 973.9384         | 1945.8854      | 973.4464         | 17 |
| 3  | <b>408.1401</b> | 204.5737        | 390.1296       | 195.5684         | E    | 1800.8327        | <b>900.9200</b> | 1783.8061      | <b>892.4067</b>  | 1782.8221      | 891.9147         | 16 |
| 4  | <b>523.1671</b> | 262.0872        | 505.1565       | 253.0819         | D    | 1671.7901        | <b>836.3987</b> | 1654.7635      | <b>827.8854</b>  | 1653.7795      | 827.3934         | 15 |
| 5  | 620.2198        | 310.6136        | 602.2093       | 301.6083         | P    | 1556.7631        | <b>778.8852</b> | 1539.7366      | 770.3719         | 1538.7526      | 769.8799         | 14 |
| 6  | 717.2726        | <b>359.1399</b> | 699.2620       | 350.1347         | P    | 1459.7104        | <b>730.3588</b> | 1442.6838      | 721.8455         | 1441.6998      | 721.3535         | 13 |
| 7  | 814.3254        | 407.6663        | 796.3148       | 398.6610         | P    | 1362.6576        | <b>681.8324</b> | 1345.6311      | 673.3192         | 1344.6470      | 672.8272         | 12 |
| 8  | 897.3625        | 449.1849        | 879.3519       | 440.1796         | T    | 1265.6048        | <b>633.3061</b> | 1248.5783      | 624.7928         | 1247.5943      | 624.3008         | 11 |
| 9  | 994.4152        | 497.7113        | 976.4047       | 488.7060         | P    | <b>1182.5677</b> | <b>591.7875</b> | 1165.5412      | 583.2742         | 1164.5572      | 582.7822         | 10 |
| 10 | 1141.4837       | 571.2455        | 1123.4731      | 562.2402         | F    | 1085.5150        | 543.2611        | 1068.4884      | 534.7478         | 1067.5044      | 534.2558         | 9  |
| 11 | 1288.5521       | 644.7797        | 1270.5415      | 635.7744         | F    | <b>938.4466</b>  | 469.7269        | 921.4200       | 461.2136         | 920.4360       | 460.7216         | 8  |
| 12 | 1403.5790       | 702.2931        | 1385.5685      | 693.2879         | D    | <b>791.3781</b>  | 396.1927        | 774.3516       | 387.6794         | 773.3676       | 387.1874         | 7  |
| 13 | 1474.6161       | 737.8117        | 1456.6056      | 728.8064         | A    | 676.3512         | 338.6792        | 659.3246       | 330.1660         | 658.3406       | 329.6740         | 6  |
| 14 | 1589.6431       | 795.3252        | 1571.6325      | 786.3199         | D    | 605.3141         | 303.1607        | 588.2875       | 294.6474         | 587.3035       | 294.1554         | 5  |
| 15 | 1718.6857       | 859.8465        | 1700.6751      | 850.8412         | E    | 490.2871         | 245.6472        | 473.2606       | 237.1339         | 472.2766       | 236.6419         | 4  |
| 16 | 1831.7697       | 916.3885        | 1813.7592      | 907.3832         | L    | 361.2445         | 181.1259        | 344.2180       | 172.6126         | 343.2340       | 172.1206         | 3  |
| 17 | 1932.8174       | 966.9123        | 1914.8068      | 957.9071         | T    | 248.1605         | 124.5839        | 231.1339       | 116.0706         | 230.1499       | 115.5786         | 2  |
| 18 |                 |                 |                |                  | K    | 147.1128         | 74.0600         | 130.0863       | 65.5468          |                |                  | 1  |

# PIP22 (15-32) 1Met



Monoisotopic mass of neutral peptide Mr (calc): 2109.9419

Fixed modifications: Carbamidomethyl (C)

Variable modifications:

E3: Methyl (DE)

**Ions Score: 42**

**Bold red:** Matches

| #  | b               | b <sup>++</sup> | b <sup>0</sup> | b <sup>0++</sup> | Seq. | y                | y <sup>++</sup> | y <sup>*</sup> | y <sup>+++</sup> | y <sup>0</sup> | y <sup>0++</sup> | #  |
|----|-----------------|-----------------|----------------|------------------|------|------------------|-----------------|----------------|------------------|----------------|------------------|----|
| 1  | 116.0342        | 58.5207         | 98.0237        | 49.5155          | D    |                  |                 |                |                  |                |                  | 18 |
| 2  | <b>279.0975</b> | 140.0524        | 261.0870       | 131.0471         | Y    | 1995.9222        | 998.4648        | 1978.8957      | 989.9515         | 1977.9117      | 989.4595         | 17 |
| 3  | 422.1558        | 211.5815        | 404.1452       | 202.5763         | E    | 1832.8589        | 916.9331        | 1815.8323      | 908.4198         | 1814.8483      | 907.9278         | 16 |
| 4  | 537.1827        | 269.0950        | 519.1722       | 260.0897         | D    | 1689.8006        | <b>845.4040</b> | 1672.7741      | 836.8907         | 1671.7901      | 836.3987         | 15 |
| 5  | 634.2355        | 317.6214        | 616.2249       | 308.6161         | P    | 1574.7737        | <b>787.8905</b> | 1557.7472      | 779.3772         | 1556.7631      | <b>778.8852</b>  | 14 |
| 6  | 731.2883        | 366.1478        | 713.2777       | 357.1425         | P    | <b>1477.7209</b> | <b>739.3641</b> | 1460.6944      | 730.8508         | 1459.7104      | 730.3588         | 13 |
| 7  | 828.3410        | 414.6742        | 810.3305       | 405.6689         | P    | <b>1380.6682</b> | 690.8377        | 1363.6416      | 682.3245         | 1362.6576      | 681.8324         | 12 |
| 8  | 929.3887        | 465.1980        | 911.3781       | 456.1927         | T    | <b>1283.6154</b> | 642.3113        | 1266.5889      | 633.7981         | 1265.6048      | 633.3061         | 11 |
| 9  | 1026.4415       | 513.7244        | 1008.4309      | 504.7191         | P    | <b>1182.5677</b> | <b>591.7875</b> | 1165.5412      | 583.2742         | 1164.5572      | 582.7822         | 10 |
| 10 | 1173.5099       | 587.2586        | 1155.4993      | 578.2533         | F    | <b>1085.5150</b> | 543.2611        | 1068.4884      | 534.7478         | 1067.5044      | 534.2558         | 9  |
| 11 | 1320.5783       | 660.7928        | 1302.5677      | 651.7875         | F    | <b>938.4466</b>  | <b>469.7269</b> | 921.4200       | 461.2136         | 920.4360       | 460.7216         | 8  |
| 12 | 1435.6052       | 718.3063        | 1417.5947      | 709.3010         | D    | 791.3781         | 396.1927        | 774.3516       | 387.6794         | 773.3676       | 387.1874         | 7  |
| 13 | 1506.6424       | 753.8248        | 1488.6318      | 744.8195         | A    | 676.3512         | 338.6792        | 659.3246       | 330.1660         | 658.3406       | 329.6740         | 6  |
| 14 | 1621.6693       | 811.3383        | 1603.6587      | 802.3330         | D    | 605.3141         | 303.1607        | 588.2875       | 294.6474         | 587.3035       | 294.1554         | 5  |
| 15 | 1750.7119       | 875.8596        | 1732.7013      | 866.8543         | E    | 490.2871         | 245.6472        | 473.2606       | 237.1339         | 472.2766       | 236.6419         | 4  |
| 16 | 1863.7960       | 932.4016        | 1845.7854      | 923.3963         | L    | 361.2445         | 181.1259        | 344.2180       | 172.6126         | 343.2340       | 172.1206         | 3  |
| 17 | 1964.8436       | 982.9255        | 1946.8331      | 973.9202         | T    | 248.1605         | 124.5839        | 231.1339       | 116.0706         | 230.1499       | 115.5786         | 2  |
| 18 |                 |                 |                |                  | K    | 147.1128         | 74.0600         | 130.0863       | 65.5468          |                |                  | 1  |

# PIP12 (loopC) 1Dea



Monoisotopic mass of neutral peptide Mr (calc): 1849.8959

Fixed modifications: Carbamidomethyl (C)

Variable modifications:

N10: deamidated (NQ)

**Ions Score: 67**

**Bold red:** Matches

| #  | b               | b <sup>++</sup> | b <sup>+</sup>  | b <sup>+++</sup> | b <sup>0</sup> | b <sup>0++</sup> | Seq. | y                | y <sup>++</sup> | y <sup>+</sup> | y <sup>+++</sup> | y <sup>0</sup>  | y <sup>0++</sup> | #  |
|----|-----------------|-----------------|-----------------|------------------|----------------|------------------|------|------------------|-----------------|----------------|------------------|-----------------|------------------|----|
| 1  | <b>129.0659</b> | 65.0366         | 112.0393        | 56.5233          |                |                  | Q    |                  |                 |                |                  |                 |                  | 18 |
| 2  | <b>292.1292</b> | 146.5682        | 275.1026        | 138.0550         |                |                  | Y    | 1722.8446        | 861.9259        | 1705.8180      | 853.4126         | 1704.8340       | 852.9206         | 17 |
| 3  | <b>420.1878</b> | 210.5975        | <b>403.1612</b> | 202.0842         |                |                  | Q    | 1559.7812        | 780.3943        | 1542.7547      | <b>771.8810</b>  | 1541.7707       | <b>771.3890</b>  | 16 |
| 4  | <b>491.2249</b> | 246.1161        | <b>474.1983</b> | 237.6028         |                |                  | A    | 1431.7227        | <b>716.3650</b> | 1414.6961      | 707.8517         | 1413.7121       | 707.3597         | 15 |
| 5  | 604.3089        | <b>302.6581</b> | 587.2824        | 294.1448         |                |                  | L    | 1360.6856        | <b>680.8464</b> | 1343.6590      | 672.3331         | 1342.6750       | 671.8411         | 14 |
| 6  | 661.3304        | 331.1688        | 644.3039        | 322.6556         |                |                  | G    | 1247.6015        | <b>624.3044</b> | 1230.5749      | 615.7911         | 1229.5909       | <b>615.2991</b>  | 13 |
| 7  | 718.3519        | 359.6796        | 701.3253        | 351.1663         |                |                  | G    | 1190.5800        | <b>595.7936</b> | 1173.5535      | 587.2804         | 1172.5695       | 586.7884         | 12 |
| 8  | 775.3733        | 388.1903        | <b>758.3468</b> | 379.6770         |                |                  | G    | 1133.5586        | <b>567.2829</b> | 1116.5320      | 558.7696         | 1115.5480       | 558.2776         | 11 |
| 9  | 846.4104        | 423.7089        | 829.3839        | 415.1956         |                |                  | A    | 1076.5371        | <b>538.7722</b> | 1059.5105      | 530.2589         | 1058.5265       | 529.7669         | 10 |
| 10 | 961.4374        | 481.2223        | 944.4108        | 472.7091         |                |                  | N    | <b>1005.5000</b> | <b>503.2536</b> | 988.4734       | 494.7404         | 987.4894        | 494.2483         | 9  |
| 11 | 1062.4851       | 531.7462        | 1045.4585       | 523.2329         | 1044.4745      | 522.7409         | T    | <b>890.4730</b>  | <b>445.7402</b> | 873.4465       | 437.2269         | 872.4625        | 436.7349         | 8  |
| 12 | 1175.5691       | 588.2882        | 1158.5426       | 579.7749         | 1157.5586      | 579.2829         | I    | <b>789.4254</b>  | <b>395.2163</b> | 772.3988       | 386.7030         | <b>771.4148</b> | 386.2110         | 7  |
| 13 | 1246.6062       | <b>623.8068</b> | 1229.5797       | <b>615.2935</b>  | 1228.5957      | 614.8015         | A    | <b>676.3413</b>  | <b>338.6743</b> | 659.3148       | 330.1610         | 658.3307        | 329.6690         | 6  |
| 14 | 1383.6652       | 692.3362        | 1366.6386       | 683.8229         | 1365.6546      | 683.3309         | H    | <b>605.3042</b>  | <b>303.1557</b> | 588.2776       | 294.6425         | 587.2936        | 294.1504         | 5  |
| 15 | 1440.6866       | 720.8469        | 1423.6601       | 712.3337         | 1422.6760      | 711.8417         | G    | <b>468.2453</b>  | 234.6263        | 451.2187       | 226.1130         | 450.2347        | 225.6210         | 4  |
| 16 | 1603.7499       | 802.3786        | 1586.7234       | 793.8653         | 1585.7394      | 793.3733         | Y    | <b>411.2238</b>  | 206.1155        | 394.1973       | 197.6023         | 393.2132        | 197.1103         | 3  |
| 17 | 1704.7976       | 852.9024        | 1687.7711       | 844.3892         | 1686.7871      | 843.8972         | T    | <b>248.1605</b>  | 124.5839        | 231.1339       | 116.0706         | 230.1499        | 115.5786         | 2  |
| 18 |                 |                 |                 |                  |                |                  | K    | <b>147.1128</b>  | 74.0600         | 130.0863       | 65.5468          |                 |                  | 1  |



Monoisotopic mass of neutral peptide Mr (calc): 2236.1186

Fixed modifications: Carbamidomethyl (C)

Variable modifications:

Q3: deamidated (NQ)

**Ions Score: 90**

**Bold red:** Matches

| #  | b               | b <sup>++</sup> | b <sup>+</sup> | b <sup>+++</sup> | b <sup>0</sup> | b <sup>0++</sup> | Seq. | y                | y <sup>++</sup>  | y <sup>+</sup> | y <sup>+++</sup> | y <sup>0</sup>  | y <sup>0++</sup> | #  |
|----|-----------------|-----------------|----------------|------------------|----------------|------------------|------|------------------|------------------|----------------|------------------|-----------------|------------------|----|
| 1  | 58.0287         | 29.5180         |                |                  |                |                  | G    |                  |                  |                |                  |                 |                  | 23 |
| 2  | <b>205.0972</b> | 103.0522        |                |                  |                |                  | F    | 2280.1044        | 1140.5558        | 2263.0778      | 1132.0425        | 2262.0938       | <b>1131.5505</b> | 22 |
| 3  | 334.1397        | 167.5735        | 317.1132       | 159.0602         |                |                  | Q    | 2133.0360        | 1067.0216        | 2116.0094      | 1058.5083        | 2115.0254       | <b>1058.0163</b> | 21 |
| 4  | <b>431.1925</b> | 216.0999        | 414.1660       | 207.5866         |                |                  | P    | 2003.9934        | <b>1002.5003</b> | 1986.9668      | 993.9870         | 1985.9828       | <b>993.4950</b>  | 20 |
| 5  | 488.2140        | 244.6106        | 471.1874       | 236.0973         |                |                  | G    | 1906.9406        | <b>953.9739</b>  | 1889.9141      | <b>945.4607</b>  | 1888.9300       | 944.9687         | 19 |
| 6  | 601.2980        | 301.1527        | 584.2715       | 292.6394         |                |                  | L    | 1849.9191        | <b>925.4632</b>  | 1832.8926      | 916.9499         | 1831.9086       | 916.4579         | 18 |
| 7  | 764.3614        | 382.6843        | 747.3348       | 374.1710         |                |                  | Y    | 1736.8351        | <b>868.9212</b>  | 1719.8085      | 860.4079         | 1718.8245       | <b>859.9159</b>  | 17 |
| 8  | 892.4199        | 446.7136        | 875.3934       | 438.2003         |                |                  | Q    | 1573.7717        | <b>787.3895</b>  | 1556.7452      | 778.8762         | 1555.7612       | <b>778.3842</b>  | 16 |
| 9  | <b>993.4676</b> | 497.2374        | 976.4411       | 488.7242         | 975.4571       | 488.2322         | T    | <b>1445.7132</b> | <b>723.3602</b>  | 1428.6866      | 714.8469         | 1427.7026       | 714.3549         | 15 |
| 10 | 1107.5105       | 554.2589        | 1090.4840      | 545.7456         | 1089.5000      | 545.2536         | N    | <b>1344.6655</b> | <b>672.8364</b>  | 1327.6389      | <b>664.3231</b>  | 1326.6549       | 663.8311         | 14 |
| 11 | 1164.5320       | 582.7696        | 1147.5055      | 574.2564         | 1146.5214      | 573.7644         | G    | <b>1230.6226</b> | <b>615.8149</b>  | 1213.5960      | 607.3016         | 1212.6120       | 606.8096         | 13 |
| 12 | 1221.5535       | 611.2804        | 1204.5269      | 602.7671         | 1203.5429      | 602.2751         | G    | 1173.6011        | <b>587.3042</b>  | 1156.5745      | 578.7909         | 1155.5905       | 578.2989         | 12 |
| 13 | 1278.5749       | 639.7911        | 1261.5484      | 631.2778         | 1260.5644      | 630.7858         | G    | 1116.5796        | <b>558.7935</b>  | 1099.5531      | 550.2802         | 1098.5691       | 549.7882         | 11 |
| 14 | 1349.6121       | 675.3097        | 1332.5855      | 666.7964         | 1331.6015      | 666.3044         | A    | 1059.5582        | 530.2827         | 1042.5316      | 521.7694         | 1041.5476       | 521.2774         | 10 |
| 15 | 1463.6550       | 732.3311        | 1446.6284      | 723.8179         | 1445.6444      | <b>723.3258</b>  | N    | <b>988.5211</b>  | <b>494.7642</b>  | 971.4945       | 486.2509         | 970.5105        | 485.7589         | 9  |
| 16 | 1562.7234       | 781.8653        | 1545.6968      | 773.3521         | 1544.7128      | 772.8601         | V    | <b>874.4781</b>  | 437.7427         | 857.4516       | <b>429.2294</b>  | 856.4676        | 428.7374         | 8  |
| 17 | 1661.7918       | 831.3995        | 1644.7653      | 822.8863         | 1643.7812      | 822.3943         | V    | <b>775.4097</b>  | <b>388.2085</b>  | 758.3832       | 379.6952         | 757.3992        | <b>379.2032</b>  | 7  |
| 18 | 1732.8289       | 866.9181        | 1715.8024      | 858.4048         | 1714.8184      | 857.9128         | A    | <b>676.3413</b>  | <b>338.6743</b>  | 659.3148       | 330.1610         | 658.3307        | 329.6690         | 6  |
| 19 | 1869.8878       | 935.4476        | 1852.8613      | 926.9343         | 1851.8773      | 926.4423         | H    | <b>605.3042</b>  | <b>303.1557</b>  | 588.2776       | 294.6425         | <b>587.2936</b> | 294.1504         | 5  |
| 20 | 1926.9093       | 963.9583        | 1909.8827      | 955.4450         | 1908.8987      | 954.9530         | G    | <b>468.2453</b>  | 234.6263         | 451.2187       | 226.1130         | 450.2347        | 225.6210         | 4  |
| 21 | 2089.9726       | 1045.4900       | 2072.9461      | 1036.9767        | 2071.9621      | 1036.4847        | Y    | <b>411.2238</b>  | 206.1155         | 394.1973       | 197.6023         | 393.2132        | 197.1103         | 3  |
| 22 | 2191.0203       | 1096.0138       | 2173.9938      | 1087.5005        | 2173.0097      | 1087.0085        | T    | <b>248.1605</b>  | 124.5839         | 231.1339       | 116.0706         | 230.1499        | 115.5786         | 2  |
| 23 |                 |                 |                |                  |                |                  | K    | <b>147.1128</b>  | 74.0600          | 130.0863       | 65.5468          |                 |                  | 1  |



Monoisotopic mass of neutral peptide Mr (calc): 2336.1186

Fixed modifications: Carbamidomethyl (C)

Variable modifications:

N10: deamidated (NQ)

**Ions Score: 75**

**Bold red:** Matches

| #  | b               | b <sup>++</sup> | b <sup>+</sup> | b <sup>+++</sup> | b <sup>0</sup> | b <sup>0++</sup> | Seq. | y                | y <sup>++</sup>  | y <sup>±</sup> | y <sup>+++</sup> | y <sup>0</sup> | y <sup>0++</sup> | #  |
|----|-----------------|-----------------|----------------|------------------|----------------|------------------|------|------------------|------------------|----------------|------------------|----------------|------------------|----|
| 1  | 58.0287         | 29.5180         |                |                  |                |                  | G    |                  |                  |                |                  |                |                  | 23 |
| 2  | <b>205.0972</b> | 103.0522        |                |                  |                |                  | F    | 2280.1044        | 1140.5558        | 2263.0778      | 1132.0425        | 2262.0938      | <b>1131.5505</b> | 22 |
| 3  | <b>333.1557</b> | 167.0815        | 316.1292       | 158.5682         |                |                  | Q    | 2133.0360        | <b>1067.0216</b> | 2116.0094      | <b>1058.5083</b> | 2115.0254      | 1058.0163        | 21 |
| 4  | <b>430.2085</b> | 215.6079        | 413.1819       | 207.0946         |                |                  | P    | 2004.9774        | <b>1002.9923</b> | 1987.9508      | 994.4791         | 1986.9668      | <b>993.9870</b>  | 20 |
| 5  | <b>487.2300</b> | 244.1186        | 470.2034       | 235.6053         |                |                  | G    | 1907.9246        | <b>954.4659</b>  | 1890.8981      | 945.9527         | 1889.9140      | 945.4607         | 19 |
| 6  | <b>600.3140</b> | 300.6607        | 583.2875       | 292.1474         |                |                  | L    | 1850.9031        | <b>925.9552</b>  | 1833.8766      | 917.4419         | 1832.8926      | 916.9499         | 18 |
| 7  | <b>763.3774</b> | 382.1923        | 746.3508       | 373.6790         |                |                  | Y    | 1737.8191        | <b>869.4132</b>  | 1720.7925      | 860.8999         | 1719.8085      | 860.4079         | 17 |
| 8  | 891.4359        | 446.2216        | 874.4094       | <b>437.7083</b>  |                |                  | Q    | 1574.7558        | <b>787.8815</b>  | 1557.7292      | 779.3682         | 1556.7452      | 778.8762         | 16 |
| 9  | 992.4836        | 496.7454        | 975.4571       | 488.2322         | 974.4730       | 487.7402         | T    | <b>1446.6972</b> | <b>723.8522</b>  | 1429.6706      | 715.3390         | 1428.6866      | 714.8469         | 15 |
| 10 | 1107.5105       | 554.2589        | 1090.4840      | 545.7456         | 1089.5000      | 545.2536         | N    | 1345.6495        | <b>673.3284</b>  | 1328.6229      | 664.8151         | 1327.6389      | 664.3231         | 14 |
| 11 | 1164.5320       | 582.7696        | 1147.5055      | 574.2564         | 1146.5214      | 573.7644         | G    | <b>1230.6226</b> | <b>615.8149</b>  | 1213.5960      | 607.3016         | 1212.6120      | 606.8096         | 13 |
| 12 | 1221.5535       | 611.2804        | 1204.5269      | 602.7671         | 1203.5429      | 602.2751         | G    | 1173.6011        | 587.3042         | 1156.5745      | 578.7909         | 1155.5905      | 578.2989         | 12 |
| 13 | 1278.5749       | 639.7911        | 1261.5484      | 631.2778         | 1260.5644      | 630.7858         | G    | <b>1116.5796</b> | <b>558.7935</b>  | 1099.5531      | 550.2802         | 1098.5691      | 549.7882         | 11 |
| 14 | 1349.6121       | 675.3097        | 1332.5855      | 666.7964         | 1331.6015      | 666.3044         | A    | 1059.5582        | 530.2827         | 1042.5316      | 521.7694         | 1041.5476      | 521.2774         | 10 |
| 15 | 1463.6550       | 732.3311        | 1446.6284      | <b>723.8179</b>  | 1445.6444      | 723.3258         | N    | <b>988.5211</b>  | <b>494.7642</b>  | 971.4945       | 486.2509         | 970.5105       | 485.7589         | 9  |
| 16 | 1562.7234       | 781.8653        | 1545.6968      | 773.3521         | 1544.7128      | 772.8601         | V    | 874.4781         | <b>437.7427</b>  | 857.4516       | 429.2294         | 856.4676       | 428.7374         | 8  |
| 17 | 1661.7918       | 831.3995        | 1644.7653      | 822.8863         | 1643.7812      | 822.3943         | V    | 775.4097         | <b>388.2085</b>  | 758.3832       | 379.6952         | 757.3992       | <b>379.2032</b>  | 7  |
| 18 | 1732.8289       | 866.9181        | 1715.8024      | 858.4048         | 1714.8184      | 857.9128         | A    | <b>676.3413</b>  | 338.6743         | 659.3148       | 330.1610         | 658.3307       | 329.6690         | 6  |
| 19 | 1869.8878       | 935.4476        | 1852.8613      | 926.9343         | 1851.8773      | 926.4423         | H    | 605.3042         | 303.1557         | 588.2776       | 294.6425         | 587.2936       | 294.1504         | 5  |
| 20 | 1926.9093       | 963.9583        | 1909.8827      | 955.4450         | 1908.8987      | 954.9530         | G    | <b>468.2453</b>  | 234.6263         | 451.2187       | 226.1130         | 450.2347       | 225.6210         | 4  |
| 21 | 2089.9726       | 1045.4900       | 2072.9461      | 1036.9767        | 2071.9621      | 1036.4847        | Y    | 411.2238         | 206.1155         | 394.1973       | 197.6023         | 393.2132       | 197.1103         | 3  |
| 22 | 2191.0203       | 1096.0138       | 2173.9938      | 1087.5005        | 2173.0097      | 1087.0085        | T    | 248.1605         | 124.5839         | 231.1339       | 116.0706         | 230.1499       | 115.5786         | 2  |
| 23 |                 |                 |                |                  |                |                  | K    | 147.1128         | 74.0600          | 130.0863       | 65.5468          |                |                  | 1  |



Monoisotopic mass of neutral peptide Mr (calc): 2336.1186

Fixed modifications: Carbamidomethyl (C)

Variable modifications:

N15: deamidated (NQ)

Ions Score: 54

**Bold red:** Matches

| #  | b               | b <sup>++</sup> | b <sup>+</sup> | b <sup>+++</sup> | b <sup>0</sup> | b <sup>0++</sup> | Seq. | y                | y <sup>++</sup>  | y <sup>+</sup> | y <sup>+++</sup> | y <sup>0</sup> | y <sup>0++</sup> | #  |
|----|-----------------|-----------------|----------------|------------------|----------------|------------------|------|------------------|------------------|----------------|------------------|----------------|------------------|----|
| 1  | 58.0287         | 29.5180         |                |                  |                |                  | G    |                  |                  |                |                  |                |                  | 23 |
| 2  | <b>205.0972</b> | 103.0522        |                |                  |                |                  | F    | 2280.1044        | 1140.5558        | 2263.0778      | 1132.0425        | 2262.0938      | <b>1131.5505</b> | 22 |
| 3  | <b>333.1557</b> | 167.0815        | 316.1292       | 158.5682         |                |                  | Q    | 2133.0360        | <b>1067.0216</b> | 2116.0094      | <b>1058.5083</b> | 2115.0254      | 1058.0163        | 21 |
| 4  | <b>430.2085</b> | 215.6079        | 413.1819       | 207.0946         |                |                  | P    | 2004.9774        | <b>1002.9923</b> | 1987.9508      | 994.4791         | 1986.9668      | <b>993.9870</b>  | 20 |
| 5  | 487.2300        | 244.1186        | 470.2034       | 235.6053         |                |                  | G    | 1907.9246        | <b>954.4659</b>  | 1890.8981      | 945.9527         | 1889.9140      | 945.4607         | 19 |
| 6  | <b>600.3140</b> | 300.6607        | 583.2875       | 292.1474         |                |                  | L    | 1850.9031        | <b>925.9552</b>  | 1833.8766      | 917.4419         | 1832.8926      | 916.9499         | 18 |
| 7  | <b>763.3774</b> | 382.1923        | 746.3508       | 373.6790         |                |                  | Y    | 1737.8191        | <b>869.4132</b>  | 1720.7925      | 860.8999         | 1719.8085      | 860.4079         | 17 |
| 8  | 891.4359        | 446.2216        | 874.4094       | <b>437.7083</b>  |                |                  | Q    | 1574.7558        | <b>787.8815</b>  | 1557.7292      | 779.3682         | 1556.7452      | 778.8762         | 16 |
| 9  | 992.4836        | 496.7454        | 975.4571       | 488.2322         | 974.4730       | 487.7402         | T    | <b>1446.6972</b> | <b>723.8522</b>  | 1429.6706      | 715.3390         | 1428.6866      | 714.8469         | 15 |
| 10 | 1106.5265       | 553.7669        | 1089.5000      | 545.2536         | 1088.5160      | 544.7616         | N    | 1345.6495        | <b>673.3284</b>  | 1328.6229      | 664.8151         | 1327.6389      | 664.3231         | 14 |
| 11 | 1163.5480       | 582.2776        | 1146.5215      | 573.7644         | 1145.5374      | 573.2724         | G    | 1231.6066        | 616.3069         | 1214.5800      | 607.7936         | 1213.5960      | 607.3016         | 13 |
| 12 | 1220.5695       | 610.7884        | 1203.5429      | 602.2751         | 1202.5589      | 601.7831         | G    | 1174.5851        | 587.7962         | 1157.5586      | 579.2829         | 1156.5745      | 578.7909         | 12 |
| 13 | 1277.5909       | 639.2991        | 1260.5644      | 630.7858         | 1259.5804      | 630.2938         | G    | 1117.5636        | <b>559.2855</b>  | 1100.5371      | 550.7722         | 1099.5531      | 550.2802         | 11 |
| 14 | 1348.6280       | 674.8177        | 1331.6015      | 666.3044         | 1330.6175      | 665.8124         | A    | 1060.5422        | 530.7747         | 1043.5156      | 522.2615         | 1042.5316      | 521.7694         | 10 |
| 15 | 1463.6550       | 732.3311        | 1446.6284      | <b>723.8179</b>  | 1445.6444      | 723.3258         | N    | 989.5051         | 495.2562         | 972.4785       | 486.7429         | 971.4945       | 486.2509         | 9  |
| 16 | 1562.7234       | 781.8653        | 1545.6968      | 773.3521         | 1544.7128      | 772.8601         | V    | 874.4781         | <b>437.7427</b>  | 857.4516       | 429.2294         | 856.4676       | 428.7374         | 8  |
| 17 | 1661.7918       | 831.3995        | 1644.7653      | 822.8863         | 1643.7812      | 822.3943         | V    | 775.4097         | <b>388.2085</b>  | 758.3832       | 379.6952         | 757.3992       | <b>379.2032</b>  | 7  |
| 18 | 1732.8289       | 866.9181        | 1715.8024      | 858.4048         | 1714.8184      | 857.9128         | A    | <b>676.3413</b>  | 338.6743         | 659.3148       | 330.1610         | 658.3307       | 329.6690         | 6  |
| 19 | 1869.8878       | 935.4476        | 1852.8613      | 926.9343         | 1851.8773      | 926.4423         | H    | 605.3042         | 303.1557         | 588.2776       | 294.6425         | 587.2936       | 294.1504         | 5  |
| 20 | 1926.9093       | 963.9583        | 1909.8827      | 955.4450         | 1908.8987      | 954.9530         | G    | <b>468.2453</b>  | 234.6263         | 451.2187       | 226.1130         | 450.2347       | 225.6210         | 4  |
| 21 | 2089.9726       | 1045.4900       | 2072.9461      | 1036.9767        | 2071.9621      | 1036.4847        | Y    | 411.2238         | 206.1155         | 394.1973       | 197.6023         | 393.2132       | 197.1103         | 3  |
| 22 | 2191.0203       | 1096.0138       | 2173.9938      | 1087.5005        | 2173.0097      | 1087.0085        | T    | 248.1605         | 124.5839         | 231.1339       | 116.0706         | 230.1499       | 115.5786         | 2  |
| 23 |                 |                 |                |                  |                |                  | K    | 147.1128         | 74.0600          | 130.0863       | 65.5468          |                |                  | 1  |

# PIP24 (loopC) 1Dea



Monoisotopic mass of neutral peptide Mr (calc): 1428.6157

Fixed modifications: Carbamidomethyl (C)

Variable modifications:

N6: deamidated (NQ)

**ions Score: 86**

**Red**: Matches

| #  | b               | b <sup>++</sup> | b <sup>+</sup> | b <sup>+++</sup> | b <sup>0</sup> | b <sup>0++</sup> | Seq. | y                | y <sup>++</sup> | y <sup>+</sup> | y <sup>+++</sup> | y <sup>0</sup> | y <sup>0++</sup> | #  |
|----|-----------------|-----------------|----------------|------------------|----------------|------------------|------|------------------|-----------------|----------------|------------------|----------------|------------------|----|
| 1  | 164.0706        | 82.5389         |                |                  |                |                  | Y    |                  |                 |                |                  |                |                  | 14 |
| 2  | 221.0921        | 111.0497        |                |                  |                |                  | G    | <b>1266.5597</b> | 633.7835        | 1249.5331      | 625.2702         | 1248.5491      | 624.7782         | 13 |
| 3  | 278.1135        | 139.5604        |                |                  |                |                  | G    | <b>1209.5382</b> | 605.2727        | 1192.5117      | 596.7595         | 1191.5277      | <b>596.2675</b>  | 12 |
| 4  | <b>335.1350</b> | 168.0711        |                |                  |                |                  | G    | 1152.5168        | 576.7620        | 1135.4902      | 568.2487         | 1134.5062      | 567.7567         | 11 |
| 5  | 406.1721        | 203.5897        |                |                  |                |                  | A    | <b>1095.4953</b> | 548.2513        | 1078.4687      | 539.7380         | 1077.4847      | 539.2460         | 10 |
| 6  | 521.1990        | 261.1032        | 504.1725       | 252.5899         |                |                  | N    | <b>1024.4582</b> | 512.7327        | 1007.4316      | 504.2195         | 1006.4476      | 503.7274         | 9  |
| 7  | 650.2416        | 325.6245        | 633.2151       | 317.1112         | 632.2311       | 316.6192         | E    | <b>909.4312</b>  | 455.2193        | 892.4047       | 446.7060         | 891.4207       | 446.2140         | 8  |
| 8  | 763.3257        | 382.1665        | 746.2992       | 373.6532         | 745.3151       | 373.1612         | L    | <b>780.3886</b>  | 390.6980        | 763.3621       | 382.1847         | 762.3781       | 381.6927         | 7  |
| 9  | 834.3628        | 417.6850        | 817.3363       | 409.1718         | 816.3523       | 408.6798         | A    | <b>667.3046</b>  | 334.1559        | 650.2780       | 325.6427         | 649.2940       | 325.1506         | 6  |
| 10 | 949.3898        | 475.1985        | 932.3632       | 466.6852         | 931.3792       | 466.1932         | D    | <b>596.2675</b>  | 298.6374        | 579.2409       | 290.1241         | 578.2569       | 289.6321         | 5  |
| 11 | 1006.4112       | 503.7093        | 989.3847       | 495.1960         | 988.4007       | 494.7040         | G    | <b>481.2405</b>  | 241.1239        | 464.2140       | 232.6106         |                |                  | 4  |
| 12 | 1169.4746       | 585.2409        | 1152.4480      | 576.7276         | 1151.4640      | 576.2356         | Y    | 424.2191         | 212.6132        | 407.1925       | 204.0999         |                |                  | 3  |
| 13 | 1283.5175       | 642.2624        | 1266.4909      | 633.7491         | 1265.5069      | 633.2571         | N    | 261.1557         | 131.0815        | 244.1292       | 122.5682         |                |                  | 2  |
| 14 |                 |                 |                |                  |                |                  | K    | 147.1128         | 74.0600         | 130.0863       | 65.5468          |                |                  | 1  |

# PIP27 (loopC) 1Dea



Monoisotopic mass of neutral peptide Mr (calc): 1885.8694

Fixed modifications: Carbamidomethyl (C)

Variable modifications:

N11: deamidated (NQ)

**Ions Score: 101**

**Red**: Matches

| #  | b                | b <sup>++</sup> | b <sup>±</sup> | b <sup>+++</sup> | b <sup>0</sup> | b <sup>0++</sup> | Seq. | y                | y <sup>++</sup> | y <sup>±</sup> | y <sup>+++</sup> | y <sup>0</sup> | y <sup>0++</sup> | #  |
|----|------------------|-----------------|----------------|------------------|----------------|------------------|------|------------------|-----------------|----------------|------------------|----------------|------------------|----|
| 1  | 102.0550         | 51.5311         |                |                  | 84.0444        | 42.5258          | T    |                  |                 |                |                  |                |                  | 19 |
| 2  | <b>199.1077</b>  | 100.0575        |                |                  | 181.0972       | 91.0522          | P    | 1785.8290        | <b>893.4181</b> | 1768.8024      | 884.9049         | 1767.8184      | 884.4128         | 18 |
| 3  | <b>362.1710</b>  | 181.5892        |                |                  | 344.1605       | 172.5839         | Y    | 1688.7762        | <b>844.8917</b> | 1671.7497      | <b>836.3785</b>  | 1670.7657      | 835.8865         | 17 |
| 4  | <b>476.2140</b>  | 238.6106        | 459.1874       | 230.0974         | 458.2034       | 229.6053         | N    | <b>1525.7129</b> | 763.3601        | 1508.6863      | 754.8468         | 1507.7023      | 754.3548         | 16 |
| 5  | <b>577.2617</b>  | 289.1345        | 560.2351       | 280.6212         | 559.2511       | 280.1292         | T    | <b>1411.6700</b> | 706.3386        | 1394.6434      | 697.8253         | 1393.6594      | 697.3333         | 15 |
| 6  | <b>690.3457</b>  | 345.6765        | 673.3192       | 337.1632         | 672.3352       | 336.6712         | L    | <b>1310.6223</b> | 655.8148        | 1293.5957      | 647.3015         | 1292.6117      | 646.8095         | 14 |
| 7  | 747.3672         | 374.1872        | 730.3406       | 365.6740         | 729.3566       | 365.1819         | G    | <b>1197.5382</b> | 599.2727        | 1180.5117      | 590.7595         | 1179.5277      | 590.2675         | 13 |
| 8  | <b>804.3886</b>  | 402.6980        | 787.3621       | 394.1847         | 786.3781       | 393.6927         | G    | <b>1140.5168</b> | 570.7620        | 1123.4902      | 562.2487         | 1122.5062      | 561.7567         | 12 |
| 9  | <b>861.4101</b>  | 431.2087        | 844.3836       | 422.6954         | 843.3995       | 422.2034         | G    | <b>1083.4953</b> | 542.2513        | 1066.4687      | 533.7380         | 1065.4847      | 533.2460         | 11 |
| 10 | 932.4472         | 466.7273        | 915.4207       | 458.2140         | 914.4367       | 457.7220         | A    | 1026.4738        | 513.7406        | 1009.4473      | 505.2273         | 1008.4633      | 504.7353         | 10 |
| 11 | <b>1047.4742</b> | 524.2407        | 1030.4476      | 515.7274         | 1029.4636      | 515.2354         | N    | <b>955.4367</b>  | 478.2220        | 938.4102       | 469.7087         | 937.4261       | 469.2167         | 9  |
| 12 | 1148.5218        | 574.7646        | 1131.4953      | 566.2513         | 1130.5113      | 565.7593         | T    | <b>840.4098</b>  | 420.7085        | 823.3832       | 412.1953         | 822.3992       | 411.7032         | 8  |
| 13 | 1247.5903        | 624.2988        | 1230.5637      | 615.7855         | 1229.5797      | 615.2935         | V    | <b>739.3621</b>  | 370.1847        | 722.3355       | 361.6714         | 721.3515       | <b>361.1794</b>  | 7  |
| 14 | 1318.6274        | 659.8173        | 1301.6008      | 651.3040         | 1300.6168      | 650.8120         | A    | <b>640.2937</b>  | 320.6505        | 623.2671       | 312.1372         | 622.2831       | 311.6452         | 6  |
| 15 | 1433.6543        | 717.3308        | 1416.6278      | 708.8175         | 1415.6437      | 708.3255         | D    | <b>569.2566</b>  | 285.1319        | 552.2300       | 276.6186         | 551.2460       | 276.1266         | 5  |
| 16 | 1490.6758        | 745.8415        | 1473.6492      | 737.3283         | 1472.6652      | 736.8362         | G    | <b>454.2296</b>  | 227.6185        | 437.2031       | 219.1052         | 436.2191       | 218.6132         | 4  |
| 17 | 1653.7391        | 827.3732        | 1636.7126      | 818.8599         | 1635.7285      | 818.3679         | Y    | 397.2082         | <b>199.1077</b> | 380.1816       | 190.5944         | 379.1976       | 190.1024         | 3  |
| 18 | 1740.7711        | 870.8892        | 1723.7446      | 862.3759         | 1722.7606      | 861.8839         | S    | <b>234.1448</b>  | 117.5761        | 217.1183       | 109.0628         | 216.1343       | 108.5708         | 2  |
| 19 |                  |                 |                |                  |                |                  | K    | 147.1128         | 74.0600         | 130.0863       | 65.5468          |                |                  | 1  |

# PIP21 (272-282) 1P



Monoisotopic mass of neutral peptide  $M_r$  (calc): 1740.7720

Fixed modifications: Carbamidomethyl (C)

Variable modifications:

S9: Phospho (ST), with neutral losses 97.9769 (shown in table), 0.0000

**Ions Score: 69**

**Bold red:** Matches

| #  | b               | b <sup>++</sup> | b <sup>+</sup> | b <sup>±</sup> | b <sup>0</sup>  | b <sup>0++</sup> | Seq. | y               | y <sup>++</sup> | y <sup>±</sup>  | y <sup>±</sup>  | y <sup>0</sup>  | y <sup>0++</sup> | #  |
|----|-----------------|-----------------|----------------|----------------|-----------------|------------------|------|-----------------|-----------------|-----------------|-----------------|-----------------|------------------|----|
| 1  | 72.0444         | 36.5258         |                |                |                 |                  | A    |                 |                 |                 |                 |                 |                  | 11 |
| 2  | 159.0764        | 80.0418         |                |                | 141.0659        | 71.0366          | S    | 1007.5269       | <b>504.2671</b> | 990.5003        | 495.7538        | 989.5163        | 495.2618         | 10 |
| 3  | <b>216.0979</b> | 108.5526        |                |                | <b>198.0873</b> | 99.5473          | G    | <b>920.4948</b> | <b>460.7511</b> | 903.4683        | 452.2378        | 902.4843        | 451.7458         | 9  |
| 4  | 303.1299        | 152.0686        |                |                | 285.1193        | 143.0633         | S    | <b>863.4734</b> | 432.2403        | 846.4468        | 423.7270        | <b>845.4628</b> | 423.2350         | 8  |
| 5  | <b>431.2249</b> | <b>216.1161</b> | 414.1983       | 207.6028       | 413.2143        | 207.1108         | K    | <b>776.4413</b> | <b>388.7243</b> | 759.4148        | 380.2110        | 758.4308        | 379.7190         | 7  |
| 6  | 518.2569        | 259.6321        | 501.2304       | 251.1188       | 500.2463        | 250.6268         | S    | <b>648.3464</b> | 324.6768        | 631.3198        | 316.1636        | <b>630.3358</b> | 315.6715         | 6  |
| 7  | 631.3410        | 316.1741        | 614.3144       | 307.6608       | 613.3304        | 307.1688         | L    | <b>561.3144</b> | 281.1608        | 544.2878        | 272.6475        | 543.3038        | 272.1555         | 5  |
| 8  | 688.3624        | 344.6849        | 671.3359       | 336.1716       | 670.3519        | 335.6796         | G    | <b>448.2303</b> | 224.6188        | <b>431.2037</b> | <b>216.1055</b> | 430.2197        | 215.6135         | 4  |
| 9  | 757.3839        | 379.1956        | 740.3573       | 370.6823       | 739.3733        | 370.1903         | S    | <b>391.2088</b> | 196.1080        | 374.1823        | 187.5948        | <b>373.1983</b> | 187.1028         | 3  |
| 10 | 904.4523        | 452.7298        | 887.4257       | 444.2165       | 886.4417        | 443.7245         | F    | <b>322.1874</b> | 161.5973        | 305.1608        | 153.0840        |                 |                  | 2  |
| 11 |                 |                 |                |                |                 |                  | R    | <b>175.1190</b> | 88.0631         | 158.0924        | 79.5498         |                 |                  | 1  |

# PIP21 (277-282) 1P



Monoisotopic mass of neutral peptide Mr (calc): 745.3160

Fixed modifications: Carbamidomethyl (C)

Variable modifications:

S4: Phospho (ST), with neutral losses 97.9769 (shown in table), 0.0000

**Ions Score: 44**

**Bold red:** Matches

| # | b        | b <sup>++</sup> | b <sup>0</sup> | b <sup>0++</sup> | Seq. | y               | y <sup>++</sup> | y*              | y <sup>+++</sup> | y <sup>0</sup> | y <sup>0++</sup> | # |
|---|----------|-----------------|----------------|------------------|------|-----------------|-----------------|-----------------|------------------|----------------|------------------|---|
| 1 | 88.0393  | 44.5233         | 70.0287        | 35.5180          | S    |                 |                 |                 |                  |                |                  | 6 |
| 2 | 201.1234 | 101.0653        | 183.1128       | 92.0600          | L    | <b>561.3144</b> | 281.1608        | <b>544.2878</b> | 272.6475         | 543.3038       | 272.1555         | 5 |
| 3 | 258.1448 | 129.5761        | 240.1343       | 120.5708         | G    | <b>448.2303</b> | 224.6188        | <b>431.2037</b> | 216.1055         | 430.2197       | 215.6135         | 4 |
| 4 | 327.1663 | 164.0868        | 309.1557       | 155.0815         | S    | <b>391.2088</b> | 196.1080        | 374.1823        | 187.5948         | 373.1983       | 187.1028         | 3 |
| 5 | 474.2347 | 237.6210        | 456.2241       | 228.6157         | F    | <b>322.1874</b> | 161.5973        | 305.1608        | 153.0840         |                |                  | 2 |
| 6 |          |                 |                |                  | R    | <b>175.1190</b> | 88.0631         | 158.0924        | 79.5498          |                |                  | 1 |



Monoisotopic mass of neutral peptide Mr (calc): 1187.5336

Fixed modifications: Carbamidomethyl (C)

Variable modifications:

S4: Phospho (ST), with neutral losses 97.9769 (shown in table), 0.0000

**Ions Score: 46**

**Bold red:** Matches

| #  | b               | b <sup>++</sup> | b <sup>*</sup> | b <sup>+++</sup> | b <sup>0</sup>  | b <sup>0++</sup> | Seq. | y               | y <sup>++</sup> | y <sup>*</sup>  | y <sup>+++</sup> | y <sup>0</sup>  | y <sup>0++</sup> | #  |
|----|-----------------|-----------------|----------------|------------------|-----------------|------------------|------|-----------------|-----------------|-----------------|------------------|-----------------|------------------|----|
| 1  | 88.0393         | 44.5233         |                |                  | 70.0287         | 35.5180          | S    |                 |                 |                 |                  |                 |                  | 11 |
| 2  | <b>201.1234</b> | 101.0653        |                |                  | 183.1128        | 92.0600          | L    | 1003.5319       | 502.2696        | 986.5054        | 493.7563         | 985.5214        | <b>493.2643</b>  | 10 |
| 3  | 258.1448        | 129.5761        |                |                  | <b>240.1343</b> | 120.5708         | G    | <b>890.4479</b> | 445.7276        | <b>873.4213</b> | 437.2143         | 872.4373        | 436.7223         | 9  |
| 4  | <b>327.1663</b> | 164.0868        |                |                  | 309.1557        | 155.0815         | S    | 833.4264        | 417.2168        | 816.3999        | 408.7036         | 815.4159        | 408.2116         | 8  |
| 5  | 474.2347        | 237.6210        |                |                  | 456.2241        | 228.6157         | F    | <b>764.4050</b> | 382.7061        | 747.3784        | 374.1928         | 746.3944        | 373.7008         | 7  |
| 6  | <b>630.3358</b> | 315.6715        | 613.3093       | 307.1583         | 612.3252        | 306.6663         | R    | <b>617.3365</b> | 309.1719        | 600.3100        | 300.6586         | 599.3260        | 300.1666         | 6  |
| 7  | <b>717.3678</b> | 359.1876        | 700.3413       | 350.6743         | 699.3573        | 350.1823         | S    | 461.2354        | 231.1214        | 444.2089        | 222.6081         | <b>443.2249</b> | 222.1161         | 5  |
| 8  | <b>788.4050</b> | 394.7061        | 771.3784       | 386.1928         | 770.3944        | <b>385.7008</b>  | A    | 374.2034        | 187.6053        | 357.1769        | 179.0921         |                 |                  | 4  |
| 9  | <b>859.4421</b> | <b>430.2247</b> | 842.4155       | 421.7114         | 841.4315        | 421.2194         | A    | 303.1663        | 152.0868        | 286.1397        | 143.5735         |                 |                  | 3  |
| 10 | <b>973.4850</b> | 487.2461        | 956.4584       | 478.7329         | 955.4744        | 478.2409         | N    | <b>232.1292</b> | 116.5682        | <b>215.1026</b> | 108.0550         |                 |                  | 2  |
| 11 |                 |                 |                |                  |                 |                  | V    | 118.0863        | 59.5468         |                 |                  |                 |                  | 1  |



Monoisotopic mass of neutral peptide Mr (calc): 1267.4999

Fixed modifications: Carbamidomethyl (C)

Variable modifications:

S4: Phospho (ST), with neutral losses 97.9769 (shown in table), 0.0000

S7: Phospho (ST), with neutral losses 97.9769 (shown in table), 0.0000

**Ions Score:47**

**Bold red:** Matches

| #  | b               | b <sup>++</sup> | b*       | b <sup>*++</sup> | b <sup>0</sup> | b <sup>0++</sup> | Seq. | y               | y <sup>++</sup> | y*       | y <sup>*++</sup> | y <sup>0</sup> | y <sup>0++</sup> | #  |
|----|-----------------|-----------------|----------|------------------|----------------|------------------|------|-----------------|-----------------|----------|------------------|----------------|------------------|----|
| 1  | 88.0393         | 44.5233         |          |                  | 70.0287        | 35.5180          | S    |                 |                 |          |                  |                |                  | 11 |
| 2  | <b>201.1234</b> | 101.0653        |          |                  | 183.1128       | 92.0600          | L    | 985.5214        | 493.2643        | 968.4948 | 484.7511         | 967.5108       | 484.2590         | 10 |
| 3  | <b>258.1448</b> | 129.5761        |          |                  | 240.1343       | 120.5708         | G    | <b>872.4373</b> | 436.7223        | 855.4108 | 428.2090         | 854.4267       | 427.7170         | 9  |
| 4  | <b>327.1663</b> | 164.0868        |          |                  | 309.1557       | 155.0815         | S    | 815.4158        | 408.2116        | 798.3893 | 399.6983         | 797.4053       | 399.2063         | 8  |
| 5  | 474.2347        | 237.6210        |          |                  | 456.2241       | 228.6157         | F    | 746.3944        | 373.7008        | 729.3678 | 365.1876         | 728.3838       | 364.6956         | 7  |
| 6  | <b>630.3358</b> | 315.6715        | 613.3093 | 307.1583         | 612.3252       | 306.6663         | R    | <b>599.3260</b> | 300.1666        | 582.2994 | 291.6534         | 581.3154       | 291.1613         | 6  |
| 7  | <b>699.3573</b> | 350.1823        | 682.3307 | 341.6690         | 681.3467       | 341.1770         | S    | 443.2249        | 222.1161        | 426.1983 | 213.6028         | 425.2143       | 213.1108         | 5  |
| 8  | <b>770.3944</b> | <b>385.7008</b> | 753.3678 | 377.1876         | 752.3838       | 376.6955         | A    | 374.2034        | 187.6053        | 357.1769 | 179.0921         |                |                  | 4  |
| 9  | <b>841.4315</b> | 421.2194        | 824.4049 | 412.7061         | 823.4209       | 412.2141         | A    | 303.1663        | 152.0868        | 286.1397 | 143.5735         |                |                  | 3  |
| 10 | <b>955.4744</b> | 478.2408        | 938.4479 | 469.7276         | 937.4639       | 469.2356         | N    | <b>232.1292</b> | 116.5682        | 215.1026 | 108.0550         |                |                  | 2  |
| 11 |                 |                 |          |                  |                |                  | V    | 118.0863        | 59.5468         |          |                  |                |                  | 1  |



Monoisotopic mass of neutral peptide Mr (calc): 1188.5176

Fixed modifications: Carbamidomethyl (C)

Variable modifications:

S4: Phospho (ST), with neutral losses 97.9769 (shown in table), 0.0000

N10: Deamidated (NQ)

**Ions Score: 48**

**Bold red:** Matches

| #  | b               | b <sup>++</sup> | b <sup>*</sup>  | b <sup>*++</sup> | b <sup>0</sup> | b <sup>0++</sup> | Seq. | y                | y <sup>++</sup> | y <sup>*</sup> | y <sup>*++</sup> | y <sup>0</sup>  | y <sup>0++</sup> | #  |
|----|-----------------|-----------------|-----------------|------------------|----------------|------------------|------|------------------|-----------------|----------------|------------------|-----------------|------------------|----|
| 1  | 88.0393         | 44.5233         |                 |                  | 70.0287        | 35.5180          | S    |                  |                 |                |                  |                 |                  | 11 |
| 2  | <b>201.1234</b> | 101.0653        |                 |                  | 183.1128       | 92.0600          | L    | <b>1004.5160</b> | 502.7616        | 987.4894       | 494.2483         | 986.5054        | 493.7563         | 10 |
| 3  | <b>258.1448</b> | 129.5761        |                 |                  | 240.1343       | 120.5708         | G    | <b>891.4319</b>  | <b>446.2196</b> | 874.4053       | 437.7063         | 873.4213        | 437.2143         | 9  |
| 4  | <b>327.1663</b> | 164.0868        |                 |                  | 309.1557       | 155.0815         | S    | <b>834.4104</b>  | 417.7089        | 817.3839       | 409.1956         | 816.3999        | 408.7036         | 8  |
| 5  | 474.2347        | 237.6210        |                 |                  | 456.2241       | 228.6157         | F    | <b>765.3890</b>  | 383.1981        | 748.3624       | 374.6848         | 747.3784        | 374.1928         | 7  |
| 6  | <b>630.3358</b> | 315.6715        | 613.3093        | 307.1583         | 612.3252       | 306.6663         | R    | <b>618.3206</b>  | 309.6639        | 601.2940       | 301.1506         | 600.3100        | 300.6586         | 6  |
| 7  | <b>717.3678</b> | 359.1876        | 700.3413        | 350.6743         | 699.3573       | 350.1823         | S    | 462.2194         | 231.6134        | 445.1929       | 223.1001         | <b>444.2089</b> | 222.6081         | 5  |
| 8  | <b>788.4050</b> | 394.7061        | 771.3784        | 386.1928         | 770.3944       | <b>385.7008</b>  | A    | 375.1874         | 188.0973        | 358.1609       | 179.5841         |                 |                  | 4  |
| 9  | <b>859.4421</b> | <b>430.2247</b> | 842.4155        | 421.7114         | 841.4315       | 421.2194         | A    | 304.1503         | 152.5788        | 287.1238       | 144.0655         |                 |                  | 3  |
| 10 | <b>974.4690</b> | <b>487.7381</b> | <b>957.4425</b> | 479.2249         | 956.4584       | <b>478.7329</b>  | N    | <b>233.1132</b>  | 117.0602        | 216.0866       | 108.5470         |                 |                  | 2  |
| 11 |                 |                 |                 |                  |                |                  | V    | <b>118.0863</b>  | 59.5468         |                |                  |                 |                  | 1  |



Monoisotopic mass of neutral peptide Mr (calc): 1188.5176

Fixed modifications: Carbamidomethyl (C)

Variable modifications:

S7: Phospho (ST), with neutral losses 97.9769 (shown in table), 0.0000

N10: Deamidated (NQ)

**Ions Score: 48**

**Bold red:** Matches

| #  | b               | b <sup>++</sup> | b <sup>*</sup>  | b <sup>*++</sup> | b <sup>0</sup> | b <sup>0++</sup> | Seq. | y                | y <sup>++</sup> | y <sup>*</sup> | y <sup>*++</sup> | y <sup>0</sup> | y <sup>0++</sup> | #  |
|----|-----------------|-----------------|-----------------|------------------|----------------|------------------|------|------------------|-----------------|----------------|------------------|----------------|------------------|----|
| 1  | 88.0393         | 44.5233         |                 |                  | 70.0287        | 35.5180          | S    |                  |                 |                |                  |                |                  | 11 |
| 2  | <b>201.1234</b> | 101.0653        |                 |                  | 183.1128       | 92.0600          | L    | <b>1004.5160</b> | 502.7616        | 987.4894       | 494.2483         | 986.5054       | 493.7563         | 10 |
| 3  | <b>258.1448</b> | 129.5761        |                 |                  | 240.1343       | 120.5708         | G    | <b>891.4319</b>  | 446.2196        | 874.4053       | 437.7063         | 873.4213       | 437.2143         | 9  |
| 4  | 345.1769        | <b>173.0921</b> |                 |                  | 327.1663       | 164.0868         | S    | 834.4104         | 417.7089        | 817.3839       | 409.1956         | 816.3999       | 408.7036         | 8  |
| 5  | 492.2453        | 246.6263        |                 |                  | 474.2347       | 237.6210         | F    | <b>747.3784</b>  | 374.1928        | 730.3519       | 365.6796         | 729.3678       | <b>365.1876</b>  | 7  |
| 6  | <b>648.3464</b> | 324.6768        | 631.3198        | <b>316.1636</b>  | 630.3358       | 315.6715         | R    | <b>600.3100</b>  | 300.6586        | 583.2834       | 292.1454         | 582.2994       | 291.6533         | 6  |
| 7  | <b>717.3678</b> | 359.1876        | 700.3413        | 350.6743         | 699.3573       | 350.1823         | S    | <b>444.2089</b>  | 222.6081        | 427.1823       | 214.0948         | 426.1983       | 213.6028         | 5  |
| 8  | <b>788.4050</b> | 394.7061        | 771.3784        | <b>386.1928</b>  | 770.3944       | 385.7008         | A    | 375.1874         | 188.0973        | 358.1609       | 179.5841         |                |                  | 4  |
| 9  | <b>859.4421</b> | 430.2247        | 842.4155        | 421.7114         | 841.4315       | 421.2194         | A    | 304.1503         | 152.5788        | 287.1238       | 144.0655         |                |                  | 3  |
| 10 | <b>974.4690</b> | 487.7381        | <b>957.4425</b> | 479.2249         | 956.4584       | 478.7329         | N    | <b>233.1132</b>  | 117.0602        | 216.0866       | 108.5470         |                |                  | 2  |
| 11 |                 |                 |                 |                  |                |                  | V    | 118.0863         | 59.5468         |                |                  |                |                  | 1  |

# PIP21 (277-287) 2P



Monoisotopic mass of neutral peptide Mr (calc): 1267.4999

Fixed modifications: Carbamidomethyl (C)

Variable modifications:

S4: Phospho (ST), with neutral losses 97.9769 (shown in table), 0.0000

S7: Phospho (ST), with neutral losses 97.9769 (shown in table), 0.0000

**Ions Score: 47**

**Red**: Matches

| #  | b               | b <sup>++</sup> | b*       | b <sup>*++</sup> | b <sup>0</sup> | b <sup>0++</sup> | Seq. | y               | y <sup>++</sup> | y*       | y <sup>*++</sup> | y <sup>0</sup> | y <sup>0++</sup> | #  |
|----|-----------------|-----------------|----------|------------------|----------------|------------------|------|-----------------|-----------------|----------|------------------|----------------|------------------|----|
| 1  | 88.0393         | 44.5233         |          |                  | 70.0287        | 35.5180          | S    |                 |                 |          |                  |                |                  | 11 |
| 2  | <b>201.1234</b> | 101.0653        |          |                  | 183.1128       | 92.0600          | L    | 985.5214        | 493.2643        | 968.4948 | 484.7511         | 967.5108       | 484.2590         | 10 |
| 3  | <b>258.1448</b> | 129.5761        |          |                  | 240.1343       | 120.5708         | G    | <b>872.4373</b> | 436.7223        | 855.4108 | 428.2090         | 854.4267       | 427.7170         | 9  |
| 4  | <b>327.1663</b> | 164.0868        |          |                  | 309.1557       | 155.0815         | S    | 815.4158        | 408.2116        | 798.3893 | 399.6983         | 797.4053       | 399.2063         | 8  |
| 5  | 474.2347        | 237.6210        |          |                  | 456.2241       | 228.6157         | F    | 746.3944        | 373.7008        | 729.3678 | 365.1876         | 728.3838       | 364.6956         | 7  |
| 6  | <b>630.3358</b> | 315.6715        | 613.3093 | 307.1583         | 612.3252       | 306.6663         | R    | <b>599.3260</b> | 300.1666        | 582.2994 | 291.6534         | 581.3154       | 291.1613         | 6  |
| 7  | <b>699.3573</b> | 350.1823        | 682.3307 | 341.6690         | 681.3467       | 341.1770         | S    | 443.2249        | 222.1161        | 426.1983 | 213.6028         | 425.2143       | 213.1108         | 5  |
| 8  | <b>770.3944</b> | <b>385.7008</b> | 753.3678 | 377.1876         | 752.3838       | 376.6955         | A    | 374.2034        | 187.6053        | 357.1769 | 179.0921         |                |                  | 4  |
| 9  | <b>841.4315</b> | 421.2194        | 824.4049 | 412.7061         | 823.4209       | 412.2141         | A    | 303.1663        | 152.0868        | 286.1397 | 143.5735         |                |                  | 3  |
| 10 | <b>955.4744</b> | 478.2408        | 938.4479 | 469.7276         | 937.4639       | 469.2356         | N    | <b>232.1292</b> | 116.5682        | 215.1026 | 108.0550         |                |                  | 2  |
| 11 |                 |                 |          |                  |                |                  | V    | 118.0863        | 59.5468         |          |                  |                |                  | 1  |

# PIP21 (277-287) 2P 1Dea



Monoisotopic mass of neutral peptide Mr (calc): 1268.4839

Fixed modifications: Carbamidomethyl (C)

Variable modifications:

S4: Phospho (ST), with neutral losses 97.9769 (shown in table), 0.0000

S7: Phospho (ST), with neutral losses 97.9769 (shown in table), 0.0000

N10: Deamidated (NQ)

**Ions Score: 42**

**Bold red:** Matches

| #  | b               | b <sup>++</sup> | b <sup>*</sup>  | b <sup>+++</sup> | b <sup>0</sup> | b <sup>0++</sup> | Seq. | y               | y <sup>++</sup> | y <sup>*</sup> | y <sup>+++</sup> | y <sup>0</sup> | y <sup>0++</sup> | #  |
|----|-----------------|-----------------|-----------------|------------------|----------------|------------------|------|-----------------|-----------------|----------------|------------------|----------------|------------------|----|
| 1  | 88.0393         | 44.5233         |                 |                  | 70.0287        | 35.5180          | S    |                 |                 |                |                  |                |                  | 11 |
| 2  | <b>201.1234</b> | 101.0653        |                 |                  | 183.1128       | 92.0600          | L    | 986.5054        | 493.7563        | 969.4788       | 485.2431         | 968.4948       | <b>484.7510</b>  | 10 |
| 3  | <b>258.1448</b> | 129.5761        |                 |                  | 240.1343       | 120.5708         | G    | <b>873.4213</b> | <b>437.2143</b> | 856.3948       | 428.7010         | 855.4108       | 428.2090         | 9  |
| 4  | <b>327.1663</b> | 164.0868        |                 |                  | 309.1557       | 155.0815         | S    | 816.3999        | 408.7036        | 799.3733       | 400.1903         | 798.3893       | 399.6983         | 8  |
| 5  | 474.2347        | 237.6210        |                 |                  | 456.2241       | 228.6157         | F    | <b>747.3784</b> | 374.1928        | 730.3519       | 365.6796         | 729.3678       | 365.1876         | 7  |
| 6  | <b>630.3358</b> | 315.6715        | 613.3093        | 307.1583         | 612.3252       | 306.6663         | R    | <b>600.3100</b> | 300.6586        | 583.2834       | 292.1454         | 582.2994       | 291.6533         | 6  |
| 7  | <b>699.3573</b> | 350.1823        | 682.3307        | 341.6690         | 681.3467       | 341.1770         | S    | 444.2089        | 222.6081        | 427.1823       | 214.0948         | 426.1983       | 213.6028         | 5  |
| 8  | <b>770.3944</b> | <b>385.7008</b> | 753.3678        | 377.1876         | 752.3838       | 376.6955         | A    | 375.1874        | 188.0973        | 358.1609       | 179.5841         |                |                  | 4  |
| 9  | <b>841.4315</b> | 421.2194        | 824.4049        | 412.7061         | 823.4209       | 412.2141         | A    | <b>304.1503</b> | 152.5788        | 287.1238       | 144.0655         |                |                  | 3  |
| 10 | <b>956.4584</b> | <b>478.7329</b> | <b>939.4319</b> | 470.2196         | 938.4479       | <b>469.7276</b>  | N    | <b>233.1132</b> | 117.0602        | 216.0866       | 108.5470         |                |                  | 2  |
| 11 |                 |                 |                 |                  |                |                  | V    | 118.0863        | 59.5468         |                |                  |                |                  | 1  |



Monoisotopic mass of neutral peptide Mr (calc): 1311.5649

Fixed modifications: Carbamidomethyl (C)

Variable modifications:

S4: Phospho (ST), with neutral losses 97.9769 (shown in table), 0.0000

**Ions Score: 94**

**Red**: Matches

| #  | b               | b <sup>++</sup> | b <sup>0</sup> | b <sup>0++</sup> | Seq. | y                | y <sup>++</sup> | y*              | y <sup>*++</sup> | y <sup>0</sup>   | y <sup>0++</sup> | #  |
|----|-----------------|-----------------|----------------|------------------|------|------------------|-----------------|-----------------|------------------|------------------|------------------|----|
| 1  | 72.0444         | 36.5258         |                |                  | A    |                  |                 |                 |                  |                  |                  | 12 |
| 2  | <b>185.1285</b> | 93.0679         |                |                  | L    | <b>1143.5582</b> | <b>572.2827</b> | 1126.5316       | 563.7694         | 1125.5476        | 563.2774         | 11 |
| 3  | 242.1499        | 121.5786        |                |                  | G    | <b>1030.4741</b> | <b>515.7407</b> | 1013.4475       | 507.2274         | <b>1012.4635</b> | <b>506.7354</b>  | 10 |
| 4  | <b>311.1714</b> | 156.0893        | 293.1608       | 147.0840         | S    | <b>973.4526</b>  | <b>487.2300</b> | 956.4261        | 478.7167         | 955.4421         | 478.2247         | 9  |
| 5  | 458.2398        | 229.6235        | 440.2292       | 220.6182         | F    | <b>904.4312</b>  | 452.7192        | <b>887.4046</b> | 444.2060         | <b>886.4206</b>  | 443.7139         | 8  |
| 6  | 515.2613        | 258.1343        | 497.2507       | 249.1290         | G    | <b>757.3628</b>  | 379.1850        | 740.3362        | 370.6717         | <b>739.3522</b>  | 370.1797         | 7  |
| 7  | 602.2933        | 301.6503        | 584.2827       | 292.6450         | S    | <b>700.3413</b>  | 350.6743        | 683.3148        | 342.1610         | <b>682.3307</b>  | 341.6690         | 6  |
| 8  | 749.3617        | 375.1845        | 731.3511       | 366.1792         | F    | <b>613.3093</b>  | 307.1583        | 596.2827        | 298.6450         | 595.2987         | 298.1530         | 5  |
| 9  | 806.3832        | 403.6952        | 788.3726       | 394.6899         | G    | <b>466.2409</b>  | 233.6241        | 449.2143        | 225.1108         | 448.2303         | 224.6188         | 4  |
| 10 | 893.4152        | 447.2112        | 875.4046       | 438.2059         | S    | <b>409.2194</b>  | 205.1133        | 392.1928        | 196.6001         | 391.2088         | 196.1081         | 3  |
| 11 | 1040.4836       | 520.7454        | 1022.4730      | 511.7402         | F    | <b>322.1874</b>  | 161.5973        | 305.1608        | 153.0840         |                  |                  | 2  |
| 12 |                 |                 |                |                  | R    | <b>175.1190</b>  | 88.0631         | 158.0924        | 79.5498          |                  |                  | 1  |



Monoisotopic mass of neutral peptide Mr (calc): 1311.5649

Fixed modifications: Carbamidomethyl (C)

Variable modifications:

S7: Phospho (ST), with neutral losses 97.9769 (shown in table), 0.0000

**Ion Score: 99**

**Bold red:** Matches

| #  | b               | b <sup>++</sup> | b <sup>0</sup>  | b <sup>0++</sup> | Seq. | y                | y <sup>++</sup> | y <sup>*</sup> | y <sup>+++</sup> | y <sup>0</sup>   | y <sup>0++</sup> | #  |
|----|-----------------|-----------------|-----------------|------------------|------|------------------|-----------------|----------------|------------------|------------------|------------------|----|
| 1  | 72.0444         | 36.5258         |                 |                  | A    |                  |                 |                |                  |                  |                  | 12 |
| 2  | <b>185.1285</b> | 93.0679         |                 |                  | L    | 1143.5582        | 572.2827        | 1126.5316      | 563.7694         | 1125.5476        | 563.2774         | 11 |
| 3  | <b>242.1499</b> | 121.5786        |                 |                  | G    | <b>1030.4741</b> | 515.7407        | 1013.4475      | 507.2274         | <b>1012.4635</b> | <b>506.7354</b>  | 10 |
| 4  | 329.1819        | 165.0946        | <b>311.1714</b> | 156.0893         | S    | <b>973.4526</b>  | <b>487.2300</b> | 956.4261       | 478.7167         | 955.4421         | 478.2247         | 9  |
| 5  | 476.2504        | 238.6288        | 458.2398        | 229.6235         | F    | <b>886.4206</b>  | <b>443.7139</b> | 869.3941       | 435.2007         | 868.4100         | 434.7087         | 8  |
| 6  | 533.2718        | 267.1396        | 515.2613        | 258.1343         | G    | <b>739.3522</b>  | <b>370.1797</b> | 722.3256       | 361.6665         | 721.3416         | 361.1745         | 7  |
| 7  | 602.2933        | 301.6503        | 584.2827        | 292.6450         | S    | <b>682.3307</b>  | <b>341.6690</b> | 665.3042       | 333.1557         | 664.3202         | 332.6637         | 6  |
| 8  | 749.3617        | 375.1845        | 731.3511        | 366.1792         | F    | <b>613.3093</b>  | 307.1583        | 596.2827       | 298.6450         | 595.2987         | 298.1530         | 5  |
| 9  | 806.3832        | 403.6952        | 788.3726        | 394.6899         | G    | <b>466.2409</b>  | 233.6241        | 449.2143       | 225.1108         | <b>448.2303</b>  | 224.6188         | 4  |
| 10 | 893.4152        | 447.2112        | 875.4046        | 438.2059         | S    | <b>409.2194</b>  | 205.1133        | 392.1928       | 196.6001         | 391.2088         | 196.1081         | 3  |
| 11 | 1040.4836       | 520.7454        | 1022.4730       | 511.7402         | F    | <b>322.1874</b>  | 161.5973        | 305.1608       | 153.0840         |                  |                  | 2  |
| 12 |                 |                 |                 |                  | R    | <b>175.1190</b>  | 88.0631         | 158.0924       | 79.5498          |                  |                  | 1  |



Monoisotopic mass of neutral peptide  $M_r$  (calc): 1311.5649

Fixed modifications: Carbamidomethyl (C)

Variable modifications:

S10: Phospho (ST), with neutral losses 97.9769 (shown in table), 0.0000

**Ion Score: 104**

**Bold red:** Matches

| #  | b               | b <sup>++</sup> | b <sup>0</sup>  | b <sup>0++</sup> | Seq. | y                | y <sup>++</sup> | y*              | y <sup>*++</sup> | y <sup>0</sup>   | y <sup>0++</sup> | #  |
|----|-----------------|-----------------|-----------------|------------------|------|------------------|-----------------|-----------------|------------------|------------------|------------------|----|
| 1  | 72.0444         | 36.5258         |                 |                  | A    |                  |                 |                 |                  |                  |                  | 12 |
| 2  | <b>185.1285</b> | 93.0679         |                 |                  | L    | <b>1143.5582</b> | 572.2827        | 1126.5316       | 563.7694         | 1125.5476        | <b>563.2774</b>  | 11 |
| 3  | <b>242.1499</b> | 121.5786        |                 |                  | G    | <b>1030.4741</b> | 515.7407        | 1013.4475       | 507.2274         | <b>1012.4635</b> | <b>506.7354</b>  | 10 |
| 4  | <b>329.1819</b> | 165.0946        | <b>311.1714</b> | 156.0893         | S    | <b>973.4526</b>  | 487.2300        | 956.4261        | 478.7167         | <b>955.4421</b>  | 478.2247         | 9  |
| 5  | 476.2504        | 238.6288        | 458.2398        | 229.6235         | F    | <b>886.4206</b>  | <b>443.7139</b> | <b>869.3941</b> | 435.2007         | 868.4100         | 434.7087         | 8  |
| 6  | 533.2718        | 267.1396        | 515.2613        | 258.1343         | G    | <b>739.3522</b>  | 370.1797        | 722.3256        | 361.6665         | <b>721.3416</b>  | 361.1745         | 7  |
| 7  | 620.3039        | 310.6556        | 602.2933        | 301.6503         | S    | <b>682.3307</b>  | 341.6690        | <b>665.3042</b> | 333.1557         | 664.3202         | 332.6637         | 6  |
| 8  | 767.3723        | 384.1898        | 749.3617        | 375.1845         | F    | <b>595.2987</b>  | 298.1530        | 578.2722        | 289.6397         | <b>577.2881</b>  | 289.1477         | 5  |
| 9  | 824.3937        | 412.7005        | 806.3832        | 403.6952         | G    | <b>448.2303</b>  | 224.6188        | <b>431.2037</b> | 216.1055         | 430.2197         | 215.6135         | 4  |
| 10 | 893.4152        | 447.2112        | 875.4046        | 438.2059         | S    | <b>391.2088</b>  | 196.1080        | 374.1823        | 187.5948         | 373.1983         | 187.1028         | 3  |
| 11 | 1040.4836       | 520.7454        | 1022.4730       | 511.7402         | F    | <b>322.1874</b>  | 161.5973        | 305.1608        | 153.0840         |                  |                  | 2  |
| 12 |                 |                 |                 |                  | R    | <b>175.1190</b>  | 88.0631         | 158.0924        | 79.5498          |                  |                  | 1  |

# PIP25 (276-286) 1P



Monoisotopic mass of neutral peptide Mr (calc): 1277.5918

Fixed modifications: Carbamidomethyl (C)

Variable modifications:

S4: Phospho (ST), with neutral losses 97.9769 (shown in table), 0.0000

**Ions Score: 53**

**Bold red:** Matches

| #  | b               | b <sup>++</sup> | b <sup>*</sup> | b <sup>+++</sup> | b <sup>0</sup>  | b <sup>0++</sup> | Seq. | y                | y <sup>++</sup> | y <sup>*</sup>  | y <sup>+++</sup> | y <sup>0</sup> | y <sup>0++</sup> | #  |
|----|-----------------|-----------------|----------------|------------------|-----------------|------------------|------|------------------|-----------------|-----------------|------------------|----------------|------------------|----|
| 1  | 72.0444         | 36.5258         |                |                  |                 |                  | A    |                  |                 |                 |                  |                |                  | 11 |
| 2  | <b>185.1285</b> | 93.0679         |                |                  |                 |                  | L    | <b>1109.5850</b> | <b>555.2962</b> | 1092.5585       | 546.7829         | 1091.5745      | 546.2909         | 10 |
| 3  | 242.1499        | 121.5786        |                |                  |                 |                  | G    | <b>996.5010</b>  | <b>498.7541</b> | <b>979.4744</b> | 490.2409         | 978.4904       | 489.7488         | 9  |
| 4  | <b>311.1714</b> | 156.0893        |                |                  | 293.1608        | 147.0840         | S    | <b>939.4795</b>  | 470.2434        | 922.4530        | 461.7301         | 921.4690       | 461.2381         | 8  |
| 5  | 458.2398        | 229.6235        |                |                  | <b>440.2292</b> | 220.6182         | F    | <b>870.4581</b>  | <b>435.7327</b> | 853.4315        | 427.2194         | 852.4475       | 426.7274         | 7  |
| 6  | <b>614.3409</b> | 307.6741        | 597.3143       | 299.1608         | 596.3303        | 298.6688         | R    | <b>723.3896</b>  | 362.1985        | 706.3631        | 353.6852         | 705.3791       | 353.1932         | 6  |
| 7  | <b>701.3729</b> | 351.1901        | 684.3464       | 342.6768         | 683.3624        | 342.1848         | S    | <b>567.2885</b>  | 284.1479        | 550.2620        | 275.6346         | 549.2780       | 275.1426         | 5  |
| 8  | <b>829.4315</b> | <b>415.2194</b> | 812.4050       | 406.7061         | 811.4209        | 406.2141         | Q    | 480.2565         | 240.6319        | 463.2300        | 232.1186         |                |                  | 4  |
| 9  | 926.4843        | <b>463.7458</b> | 909.4577       | 455.2325         | 908.4737        | 454.7405         | P    | <b>352.1979</b>  | 176.6026        |                 |                  |                |                  | 3  |
| 10 | 1063.5432       | <b>532.2752</b> | 1046.5166      | 523.7620         | 1045.5326       | 523.2699         | H    | <b>255.1452</b>  | 128.0762        |                 |                  |                |                  | 2  |
| 11 |                 |                 |                |                  |                 |                  | V    | 118.0863         | 59.5468         |                 |                  |                |                  | 1  |

# PIP27 (270-280) 1P



Monoisotopic mass of neutral peptide Mr (calc): 1216.5237

Fixed modifications: Carbamidomethyl (C)

Variable modifications:

S4: Phospho (ST), with neutral losses 97.9769 (shown in table), 0.0000

**Ions Score: 49**

**Bold red:** Matches

| #  | b               | b <sup>++</sup> | b <sup>*</sup> | b <sup>+++</sup> | b <sup>0</sup> | b <sup>0++</sup> | Seq. | y                | y <sup>++</sup> | y <sup>*</sup>   | y <sup>+++</sup> | y <sup>0</sup> | y <sup>0++</sup> | #  |
|----|-----------------|-----------------|----------------|------------------|----------------|------------------|------|------------------|-----------------|------------------|------------------|----------------|------------------|----|
| 1  | 72.0444         | 36.5258         |                |                  |                |                  | A    |                  |                 |                  |                  |                |                  | 11 |
| 2  | <b>185.1285</b> | 93.0679         |                |                  |                |                  | L    | <b>1048.5170</b> | 524.7622        | <b>1031.4905</b> | <b>516.2489</b>  | 1030.5065      | <b>515.7569</b>  | 10 |
| 3  | <b>242.1499</b> | 121.5786        |                |                  |                |                  | G    | <b>935.4330</b>  | 468.2201        | <b>918.4064</b>  | 459.7068         | 917.4224       | 459.2148         | 9  |
| 4  | <b>311.1714</b> | 156.0893        |                |                  | 293.1608       | 147.0840         | S    | 878.4115         | 439.7094        | 861.3849         | 431.1961         | 860.4009       | 430.7041         | 8  |
| 5  | 458.2398        | 229.6235        |                |                  | 440.2292       | 220.6182         | F    | 809.3900         | 405.1987        | 792.3635         | 396.6854         | 791.3795       | 396.1934         | 7  |
| 6  | <b>614.3409</b> | 307.6741        | 597.3143       | 299.1608         | 596.3303       | 298.6688         | R    | <b>662.3216</b>  | 331.6645        | 645.2951         | 323.1512         | 644.3111       | 322.6592         | 6  |
| 7  | 701.3729        | 351.1901        | 684.3464       | 342.6768         | 683.3624       | 342.1848         | S    | 506.2205         | 253.6139        | 489.1940         | 245.1006         | 488.2100       | 244.6086         | 5  |
| 8  | <b>815.4159</b> | <b>408.2116</b> | 798.3893       | 399.6983         | 797.4053       | 399.2063         | N    | 419.1885         | 210.0979        | 402.1619         | 201.5846         | 401.1779       | 201.0926         | 4  |
| 9  | <b>886.4530</b> | <b>443.7301</b> | 869.4264       | 435.2168         | 868.4424       | 434.7248         | A    | 305.1456         | 153.0764        | 288.1190         | 144.5631         | 287.1350       | 144.0711         | 3  |
| 10 | <b>987.5006</b> | 494.2540        | 970.4741       | 485.7407         | 969.4901       | 485.2487         | T    | <b>234.1084</b>  | 117.5579        | 217.0819         | 109.0446         | 216.0979       | 108.5526         | 2  |
| 11 |                 |                 |                |                  |                |                  | N    | <b>133.0608</b>  | 67.0340         | 116.0342         | 58.5207          |                |                  | 1  |



Monoisotopic mass of neutral peptide Mr (calc): 1296.4901

Fixed modifications: Carbamidomethyl (C)

Variable modifications:

S4: Phospho (ST), with neutral losses 97.9769 (shown in table), 0.0000

S7: Phospho (ST), with neutral losses 97.9769 (shown in table), 0.0000

**Ions Score: 42**

**Bold red:** Matches

| #  | b               | b <sup>++</sup> | b <sup>*</sup> | b <sup>+++</sup> | b <sup>0</sup> | b <sup>0++</sup> | Seq. | y               | y <sup>++</sup> | y <sup>*</sup>  | y <sup>+++</sup> | y <sup>0</sup> | y <sup>0++</sup> | #  |
|----|-----------------|-----------------|----------------|------------------|----------------|------------------|------|-----------------|-----------------|-----------------|------------------|----------------|------------------|----|
| 1  | 72.0444         | 36.5258         |                |                  |                |                  | A    |                 |                 |                 |                  |                |                  | 11 |
| 2  | <b>185.1285</b> | 93.0679         |                |                  |                |                  | L    | 1030.5065       | <b>515.7569</b> | 1013.4799       | 507.2436         | 1012.4959      | <b>506.7516</b>  | 10 |
| 3  | <b>242.1499</b> | 121.5786        |                |                  |                |                  | G    | <b>917.4224</b> | <b>459.2148</b> | <b>900.3958</b> | <b>450.7016</b>  | 899.4118       | 450.2095         | 9  |
| 4  | <b>311.1714</b> | 156.0893        |                |                  | 293.1608       | 147.0840         | S    | 860.4009        | 430.7041        | 843.3744        | 422.1908         | 842.3904       | 421.6988         | 8  |
| 5  | 458.2398        | 229.6235        |                |                  | 440.2292       | 220.6182         | F    | 791.3795        | 396.1934        | 774.3529        | 387.6801         | 773.3689       | 387.1881         | 7  |
| 6  | 614.3409        | 307.6741        | 597.3143       | 299.1608         | 596.3303       | 298.6688         | R    | <b>644.3111</b> | 322.6592        | 627.2845        | 314.1459         | 626.3005       | 313.6539         | 6  |
| 7  | <b>683.3624</b> | 342.1848        | 666.3358       | 333.6715         | 665.3518       | 333.1795         | S    | 488.2099        | 244.6086        | 471.1834        | 236.0953         | 470.1994       | 235.6033         | 5  |
| 8  | <b>797.4053</b> | <b>399.2063</b> | 780.3787       | 390.6930         | 779.3947       | 390.2010         | N    | <b>419.1885</b> | 210.0979        | 402.1619        | 201.5846         | 401.1779       | 201.0926         | 4  |
| 9  | <b>868.4424</b> | 434.7248        | 851.4158       | 426.2116         | 850.4318       | 425.7196         | A    | 305.1456        | 153.0764        | 288.1190        | 144.5631         | 287.1350       | 144.0711         | 3  |
| 10 | 969.4901        | 485.2487        | 952.4635       | 476.7354         | 951.4795       | 476.2434         | T    | <b>234.1084</b> | 117.5579        | 217.0819        | 109.0446         | 216.0979       | 108.5526         | 2  |
| 11 |                 |                 |                |                  |                |                  | N    | <b>133.0608</b> | 67.0340         | 116.0342        | 58.5207          |                |                  | 1  |



Monoisotopic mass of neutral peptide Mr (calc): 1296.4901

Fixed modifications: Carbamidomethyl (C)

Variable modifications:

S7: Phospho (ST), with neutral losses 97.9769 (shown in table), 0.0000

T10: Phospho (ST), with neutral losses 97.9769 (shown in table), 0.0000

**Ions Score: 35**

**Bold red:** Matches

| #  | b               | b <sup>++</sup> | b <sup>+</sup> | b <sup>+++</sup> | b <sup>0</sup>  | b <sup>0++</sup> | Seq. | y                | y <sup>++</sup> | y <sup>+</sup>  | y <sup>+++</sup> | y <sup>0</sup> | y <sup>0++</sup> | #  |
|----|-----------------|-----------------|----------------|------------------|-----------------|------------------|------|------------------|-----------------|-----------------|------------------|----------------|------------------|----|
| 1  | 72.0444         | 36.5258         |                |                  |                 |                  | A    |                  |                 |                 |                  |                |                  | 11 |
| 2  | <b>185.1285</b> | 93.0679         |                |                  |                 |                  | L    | <b>1030.5065</b> | <b>515.7569</b> | 1013.4799       | <b>507.2436</b>  | 1012.4959      | 506.7516         | 10 |
| 3  | <b>242.1499</b> | 121.5786        |                |                  |                 |                  | G    | <b>917.4224</b>  | <b>459.2148</b> | <b>900.3958</b> | <b>450.7016</b>  | 899.4118       | <b>450.2095</b>  | 9  |
| 4  | <b>329.1819</b> | 165.0946        |                |                  | 311.1714        | 156.0893         | S    | <b>860.4009</b>  | <b>430.7041</b> | <b>843.3744</b> | 422.1908         | 842.3904       | <b>421.6988</b>  | 8  |
| 5  | 476.2504        | 238.6288        |                |                  | 458.2398        | 229.6235         | F    | <b>773.3689</b>  | <b>387.1881</b> | <b>756.3423</b> | 378.6748         | 755.3583       | 378.1828         | 7  |
| 6  | <b>632.3515</b> | 316.6794        | 615.3249       | 308.1661         | 614.3409        | 307.6741         | R    | 626.3005         | 313.6539        | 609.2739        | 305.1406         | 608.2899       | 304.6486         | 6  |
| 7  | <b>701.3729</b> | 351.1901        | 684.3464       | 342.6768         | 683.3624        | 342.1848         | S    | 470.1994         | 235.6033        | 453.1728        | 227.0900         | 452.1888       | 226.5980         | 5  |
| 8  | <b>815.4159</b> | 408.2116        | 798.3893       | 399.6983         | 797.4053        | 399.2063         | N    | 401.1779         | 201.0926        | 384.1514        | 192.5793         | 383.1674       | 192.0873         | 4  |
| 9  | <b>886.4530</b> | 443.7301        | 869.4264       | 435.2168         | <b>868.4424</b> | 434.7248         | A    | <b>287.1350</b>  | 144.0711        | 270.1084        | 135.5579         | 269.1244       | 135.0658         | 3  |
| 10 | <b>969.4901</b> | 485.2487        | 952.4635       | 476.7354         | 951.4795        | 476.2434         | T    | <b>216.0979</b>  | 108.5526        | <b>199.0713</b> | 100.0393         | 198.0873       | 99.5473          | 2  |
| 11 |                 |                 |                |                  |                 |                  | N    | <b>133.0608</b>  | 67.0340         | 116.0342        | 58.5207          |                |                  | 1  |

# PIP27 (270-280) 1P 1Dea



Monoisotopic mass of neutral peptide Mr (calc): 1217.5078

Fixed modifications: Carbamidomethyl (C)

Variable modifications:

S4: Phospho (ST), with neutral losses 97.9769 (shown in table), 0.0000

N8: Deamidated (NQ)

**Ions Score: 58**

**Bold red:** Matches

| #  | b               | b <sup>++</sup> | b <sup>*</sup> | b <sup>+++</sup> | b <sup>0</sup>  | b <sup>0++</sup> | Seq. | y                | y <sup>++</sup> | y <sup>*</sup>  | y <sup>+++</sup> | y <sup>0</sup>  | y <sup>0++</sup> | #  |
|----|-----------------|-----------------|----------------|------------------|-----------------|------------------|------|------------------|-----------------|-----------------|------------------|-----------------|------------------|----|
| 1  | 72.0444         | 36.5258         |                |                  |                 |                  | A    |                  |                 |                 |                  |                 |                  | 11 |
| 2  | <b>185.1285</b> | 93.0679         |                |                  |                 |                  | L    | <b>1049.5010</b> | 525.2542        | 1032.4745       | <b>516.7409</b>  | 1031.4905       | 516.2489         | 10 |
| 3  | <b>242.1499</b> | 121.5786        |                |                  |                 |                  | G    | <b>936.4170</b>  | 468.7121        | <b>919.3904</b> | <b>460.1988</b>  | <b>918.4064</b> | <b>459.7068</b>  | 9  |
| 4  | <b>311.1714</b> | 156.0893        |                |                  | 293.1608        | 147.0840         | S    | <b>879.3955</b>  | 440.2014        | 862.3690        | 431.6881         | 861.3849        | 431.1961         | 8  |
| 5  | <b>458.2398</b> | 229.6235        |                |                  | 440.2292        | 220.6182         | F    | <b>810.3740</b>  | 405.6907        | 793.3475        | 397.1774         | 792.3635        | 396.6854         | 7  |
| 6  | <b>614.3409</b> | 307.6741        | 597.3143       | 299.1608         | 596.3303        | 298.6688         | R    | <b>663.3056</b>  | 332.1565        | <b>646.2791</b> | 323.6432         | 645.2951        | 323.1512         | 6  |
| 7  | <b>701.3729</b> | 351.1901        | 684.3464       | 342.6768         | 683.3624        | 342.1848         | S    | <b>507.2045</b>  | 254.1059        | 490.1780        | 245.5926         | <b>489.1940</b> | 245.1006         | 5  |
| 8  | <b>816.3999</b> | <b>408.7036</b> | 799.3733       | <b>400.1903</b>  | 798.3893        | 399.6983         | N    | <b>420.1725</b>  | 210.5899        | 403.1459        | 202.0766         | 402.1619        | 201.5846         | 4  |
| 9  | <b>887.4370</b> | 444.2221        | 870.4104       | 435.7089         | 869.4264        | 435.2168         | A    | <b>305.1456</b>  | 153.0764        | 288.1190        | 144.5631         | 287.1350        | 144.0711         | 3  |
| 10 | <b>988.4847</b> | 494.7460        | 971.4581       | 486.2327         | <b>970.4741</b> | 485.7407         | T    | <b>234.1084</b>  | 117.5579        | <b>217.0819</b> | 109.0446         | 216.0979        | 108.5526         | 2  |
| 11 |                 |                 |                |                  |                 |                  | N    | <b>133.0608</b>  | 67.0340         | 116.0342        | 58.5207          |                 |                  | 1  |

# PIP27 (270-280) 2P 1Dea



Monoisotopic mass of neutral peptide Mr (calc): 1297.4741

Fixed modifications: Carbamidomethyl (C)

Variable modifications:

S4: Phospho (ST), with neutral losses 97.9769 (shown in table), 0.0000

S7: Phospho (ST), with neutral losses 97.9769 (shown in table), 0.0000

N8: Deamidated (NQ)

**ions Score: 21**

**Bold red:** Matches

| #  | b               | b <sup>++</sup> | b <sup>*</sup> | b <sup>+++</sup> | b <sup>0</sup> | b <sup>0++</sup> | Seq. | y               | y <sup>++</sup> | y <sup>*</sup>  | y <sup>+++</sup> | y <sup>0</sup>  | y <sup>0++</sup> | #  |
|----|-----------------|-----------------|----------------|------------------|----------------|------------------|------|-----------------|-----------------|-----------------|------------------|-----------------|------------------|----|
| 1  | 72.0444         | 36.5258         |                |                  |                |                  | A    |                 |                 |                 |                  |                 |                  | 11 |
| 2  | <b>185.1285</b> | 93.0679         |                |                  |                |                  | L    | 1031.4905       | 516.2489        | 1014.4639       | 507.7356         | 1013.4799       | 507.2436         | 10 |
| 3  | <b>242.1499</b> | 121.5786        |                |                  |                |                  | G    | <b>918.4064</b> | 459.7068        | <b>901.3798</b> | 451.1936         | 900.3958        | 450.7016         | 9  |
| 4  | <b>311.1714</b> | 156.0893        |                |                  | 293.1608       | 147.0840         | S    | 861.3849        | 431.1961        | 844.3584        | 422.6828         | 843.3744        | 422.1908         | 8  |
| 5  | 458.2398        | 229.6235        |                |                  | 440.2292       | 220.6182         | F    | 792.3635        | 396.6854        | 775.3369        | 388.1721         | <b>774.3529</b> | 387.6801         | 7  |
| 6  | 614.3409        | 307.6741        | 597.3143       | 299.1608         | 596.3303       | 298.6688         | R    | <b>645.2951</b> | 323.1512        | 628.2685        | 314.6379         | 627.2845        | 314.1459         | 6  |
| 7  | <b>683.3624</b> | 342.1848        | 666.3358       | 333.6715         | 665.3518       | 333.1795         | S    | 489.1940        | 245.1006        | 472.1674        | 236.5873         | 471.1834        | 236.0953         | 5  |
| 8  | <b>798.3893</b> | <b>399.6983</b> | 781.3627       | 391.1850         | 780.3787       | 390.6930         | N    | 420.1725        | 210.5899        | 403.1459        | 202.0766         | 402.1619        | 201.5846         | 4  |
| 9  | <b>869.4264</b> | 435.2168        | 852.3999       | 426.7036         | 851.4158       | 426.2116         | A    | 305.1456        | 153.0764        | 288.1190        | 144.5631         | 287.1350        | 144.0711         | 3  |
| 10 | <b>970.4741</b> | 485.7407        | 953.4475       | 477.2274         | 952.4635       | 476.7354         | T    | <b>234.1084</b> | 117.5579        | <b>217.0819</b> | 109.0446         | 216.0979        | 108.5526         | 2  |
| 11 |                 |                 |                |                  |                |                  | N    | <b>133.0608</b> | 67.0340         | 116.0342        | 58.5207          |                 |                  | 1  |

# PIP28 (268-278) 1P



Monoisotopic mass of neutral peptide Mr (calc): 1256.5550

Fixed modifications: Carbamidomethyl (C)

Variable modifications:

S4: Phospho (ST), with neutral losses 97.9769 (shown in table), 0.0000

**Ions Score: 41**

**Bold red:** Matches

| #  | b                | b <sup>++</sup> | b <sup>*</sup> | b <sup>+++</sup> | b <sup>0</sup> | b <sup>0++</sup> | Seq. | y                | y <sup>++</sup> | y <sup>*</sup>  | y <sup>+++</sup> | y <sup>0</sup> | y <sup>0++</sup> | #  |
|----|------------------|-----------------|----------------|------------------|----------------|------------------|------|------------------|-----------------|-----------------|------------------|----------------|------------------|----|
| 1  | 72.0444          | 36.5258         |                |                  |                |                  | A    |                  |                 |                 |                  |                |                  | 11 |
| 2  | <b>185.1285</b>  | 93.0679         |                |                  |                |                  | L    | <b>1088.5483</b> | <b>544.7778</b> | 1071.5218       | 536.2645         | 1070.5378      | 535.7725         | 10 |
| 3  | 256.1656         | 128.5864        |                |                  |                |                  | A    | <b>975.4643</b>  | 488.2358        | <b>958.4377</b> | 479.7225         | 957.4537       | <b>479.2305</b>  | 9  |
| 4  | 325.1870         | 163.0971        |                |                  | 307.1765       | 154.0919         | S    | <b>904.4271</b>  | 452.7172        | 887.4006        | 444.2039         | 886.4166       | 443.7119         | 8  |
| 5  | 472.2554         | 236.6314        |                |                  | 454.2449       | 227.6261         | F    | <b>835.4057</b>  | 418.2065        | 818.3791        | 409.6932         | 817.3951       | 409.2012         | 7  |
| 6  | <b>628.3565</b>  | 314.6819        | 611.3300       | 306.1686         | 610.3460       | 305.6766         | R    | <b>688.3373</b>  | 344.6723        | 671.3107        | 336.1590         | 670.3267       | 335.6670         | 6  |
| 7  | 715.3886         | 358.1979        | 698.3620       | 349.6847         | 697.3780       | 349.1926         | S    | 532.2362         | 266.6217        | 515.2096        | 258.1084         | 514.2256       | 257.6164         | 5  |
| 8  | <b>829.4315</b>  | 415.2194        | 812.4050       | 406.7061         | 811.4209       | 406.2141         | N    | 445.2041         | 223.1057        | 428.1776        | 214.5924         | 427.1936       | 214.1004         | 4  |
| 9  | 926.4843         | 463.7458        | 909.4577       | 455.2325         | 908.4737       | 454.7405         | P    | <b>331.1612</b>  | 166.0842        | 314.1347        | 157.5710         | 313.1506       | 157.0790         | 3  |
| 10 | <b>1027.5319</b> | 514.2696        | 1010.5054      | 505.7563         | 1009.5214      | <b>505.2643</b>  | T    | <b>234.1084</b>  | 117.5579        | 217.0819        | 109.0446         | 216.0979       | 108.5526         | 2  |
| 11 |                  |                 |                |                  |                |                  | N    | <b>133.0608</b>  | 67.0340         | 116.0342        | 58.5207          |                |                  | 1  |
